1 *Mycobacterium abscessus* virulence traits unraveled by transcriptomic profiling in amoeba  
2 and macrophages

3

4 Violaine Dubois<sup>1</sup>, Alexandre Pawlik<sup>2</sup>, Anouchka Bories<sup>1</sup>, Vincent Le Moigne<sup>1</sup>, Odile  
5 Sismeiro<sup>3</sup>, Rachel Legendre<sup>3,4</sup>, Hugo Varet<sup>3,4</sup>, Pilar Rodriguez<sup>7</sup>, Jean-Louis Gaillard<sup>1,5</sup>, Jean-  
6 Yves Coppée<sup>3</sup>, Roland Brosch<sup>2</sup>, Jean-Louis Herrmann<sup>1,6\*</sup> and Fabienne Girard-Misguich<sup>1\*</sup>

7

8 <sup>1</sup> 2I, UVSQ, INSERM, Université Paris-Saclay, Versailles, France.

9 <sup>2</sup> Unité de Pathogénomique Mycobactérienne intégrée, Institut Pasteur, Paris, France

10 <sup>3</sup> Institut Pasteur - Bioinformatics and Biostatistics Hub - C3BI, USR 3756 IP CNRS, Paris,  
11 France.

12 <sup>4</sup> Institut Pasteur - Transcriptome and Epigenome Platform - Biomics Pole - C2RT, Paris,  
13 France.

14 <sup>5</sup> APHP, GHU PIFO, Hôpital Ambroise Paré, Boulogne Billancourt, France.

15 <sup>6</sup> APHP, GHU PIFO, Hôpital Raymond Poincaré, Garches, France.

16 <sup>7</sup> Laboratoire d'Écologie, Systématique et Évolution, Université Paris-Saclay, Orsay, France  
17

18

19 **Key words:** Amoeba, Macrophage, *Mycobacterium abscessus*, virulence, replication

20 **Short title:** *Mycobacterium abscessus* virulence modeled by environmental amoebae

21 \* Correspondence: Fabienne Girard-Misguich: [fabienne.misguich@uvsq.fr](mailto:fabienne.misguich@uvsq.fr); Jean-Louis  
22 Herrmann: [jean-louis.herrmann@aphp.fr](mailto:jean-louis.herrmann@aphp.fr)

23 **Abstract**

24 Free-living amoebae might represent an evolutionary niche. In order to get more insights into  
25 the potential amoebal training ground for *Mycobacterium abscessus*, we characterized its full  
26 transcriptome in amoeba (Ac) and macrophages (M $\phi$ ), as well as the *Mycobacterium chelonae*  
27 intra-Ac transcriptome for comparison. Up-regulated genes in Ac allowed *M. abscessus* to  
28 resist environmental stress and induce defense mechanisms, as well as showing switch from  
29 carbohydrate carbon sources to fatty acid metabolism. Eleven genes implicated in the  
30 adaptation to intracellular stress, were mutated, with all but one confirmed to be involved in  
31 *M. abscessus* intra-M $\phi$  survival. Cloning two of these genes in *M. chelonae* increased its intra-  
32 M $\phi$  survival. One mutant was particularly attenuated in M $\phi$  that corresponded to the deletion  
33 of an Eis N-acetyl transferase protein (*MAB\_4532c*). Taken together, *M. abscessus*  
34 transcriptomes revealed the intracellular lifestyle of the mycobacteria, with Ac largely  
35 contributing to the enhancement of *M. abscessus* intra-M $\phi$  survival.

## 36 **Introduction**

37 To date, most of the known mycobacterial species are environmental organisms found in soil  
38 (Lavania et al., 2008), air (Angenent et al., 2005) and water (Ben Salah et al., 2009; Gomila et  
39 al., 2008; Guidotti et al., 2008), and belong to the Rapid Growing Mycobacteria (RGM). In  
40 contrast, most of the host-associated mycobacteria are slow growing mycobacteria (SGM).  
41 However, some exceptions exist. *Mycobacterium abscessus* and members of the  
42 *Mycobacterium chelonae* complex, in addition to *Mycobacterium fortuitum*, represent the main  
43 opportunistic pathogens among RGM (Griffith et al., 2007).

44 Identification of the last common ancestor of the genus *Mycobacterium* is still a matter of  
45 debate, although recent studies proposed the ancestor as an environmental species that evolved  
46 either as a soil-borne mycobacterium, as a waterborne mycobacterium such as *Mycobacterium*  
47 *avium-intracellulare* and *Mycobacterium marinum*, or as a host-associated mycobacterium  
48 such as *Mycobacterium avium* subsp *paratuberculosis* and *M. avium* subsp *avium*,  
49 *Mycobacterium tuberculosis* complex (MTBC) species and *Mycobacterium leprae* (Ahmed et  
50 al., 2007; Stinear et al., 2008).

51 Compared to other non-tuberculous mycobacteria (NTM), recovery of *M. abscessus* from the  
52 environment is rare (Thomson et al., 2013). Information from its genome sequence indicates its  
53 presence at the interface of soil, vegetation and water, an environment where free-living  
54 amoebae (FLA) are commonly found (Ripoll et al., 2009). FLA have been isolated from habitats  
55 in common with mycobacteria (Falkinham, 2009; Thomas and McDonnell, 2007) including  
56 cold-drinking water systems (Eddyani et al., 2008; Thomas et al., 2006), hot water systems in  
57 hospitals and cooling towers (Pagnier et al., 2008). FLA are ubiquitous organisms that feed on  
58 bacteria, and these bacteria have likely developed adaptations to the intracellular lifestyle to  
59 become amoeba-resistant bacteria (ARB) (Adékambi et al., 2006; Lamrabet et al., 2012).  
60 Mycobacteria have been isolated from such habitats by amoebal enrichment (Thomas et al.,

61 2006)(White et al., 2010), allowing potential evolution toward pathogenicity by the acquisition  
62 of virulence genes by horizontal gene transfer (Gutierrez *et al.*, 2005; Ripoll *et al.*, 2009).  
63 Finally, amoebae are often considered as an ancestral form of macrophages (M $\phi$ ) sharing  
64 similar cellular structures and biological features (Barker and Brown, 1994; Greub and Raoult,  
65 2004; Siddiqui and Khan, 2012).

66 *M. abscessus* has been shown to be resistant to amoeba phagocytosis and encystment, a  
67 property shared with all mycobacteria with the exception of the attenuated *M. bovis* BCG  
68 vaccine strain (Adékambi *et al.*, 2006; Salah *et al.*, 2009; Bakala N’Goma *et al.*, 2015). In  
69 addition, co-culture of *M. abscessus* with *Acanthamoeba castellanii* (Ac) increases its virulence  
70 when aerosolized in mice (Bakala N’Goma *et al.*, 2015) suggesting the existence of an amoebal  
71 ‘training ground’ for opportunistic pathogenic mycobacteria. Similarly, co-culture of amoebae  
72 with *M. avium* was found to trigger *M. avium* virulence by enhancing both entry and  
73 intracellular multiplication of the bacterium (Cirillo *et al.*, 1997). The essential role of the ESX-  
74 4 *M. abscessus* type VII secretion system (T7SS) has also been demonstrated based on an intra-  
75 amoebal viability screen of *M. abscessus*, unraveling for the first time the active role of ESX-4  
76 in intracellular *M. abscessus* survival (Laencina *et al.*, 2018).

77 In order to gain more insights into the proposed amoebal training ground for *M. abscessus*, we  
78 characterized the full transcriptome of *M. abscessus* in Ac and M $\phi$ , as well as the *M. chelonae*  
79 intra-amoebal transcriptome for comparison and characterization of *M. abscessus* virulence  
80 adaptations to intracellular life. Although amoebae and M $\phi$  share common features, it has been  
81 shown that an intra-amoebal life requires specific adaptations (Laencina *et al.*, 2018). A full  
82 description and analysis of *M. abscessus* transcriptomes will allow the identification of  
83 essential genes and a complete picture of *M. abscessus* intracellular replication and survival,  
84 whether in an amoeba environmental host or in M $\phi$ , and elucidation of the mechanisms  
85 employed by the bacteria to resist host responses.

## 87 **Results**

### 88 *Overall description of the M. abscessus intracellular transcriptomes*

89 RNAseq data from *M. abscessus* planktonic or intracellular cultures (3 to 4 replicates per  
90 condition) were analyzed and compared to identify *M. abscessus* genes that were up- or down-  
91 regulated after Ac and M $\phi$  co-cultures. Transcriptomes of *M. abscessus* in-Ac 4 and 16 hours  
92 post-infection (hpi), in M $\phi$  16 hpi and transcriptomes of *M. chelonae* in Ac 16 hpi were obtained  
93 and invariant genes were excluded from the analyses. Normalization and hierarchical clustering  
94 of normalized raw data confirmed the quality of transcriptomes (**Sup. Figure 1**). Differentially  
95 expressed genes (DEGs) were identified using the *DESeq2* package (Love et al., 2014) (Sup.  
96 Table 1) and the Log<sub>2</sub> fold change (FC) values from *M. abscessus* transcriptomes were  
97 compared (**Sup. Figure 2**). In Ac, most DEGs up-regulated or down-regulated at 4hpi were still  
98 up- or down-regulated at 16hpi (**Figure 1A**). In order to detail the biological changes that  
99 correlated with *M. abscessus* intracellular regulation, we first grouped the DEGs in cluster of  
100 orthologues (Cluster of Orthologous Groups or COGs) (Tatusov et al., 2000). Highly up-  
101 regulated genes in Ac were more frequently found in COG O (Post-translational modification,  
102 protein turnover, chaperones), COG K (Transcription) and COG I (Lipid transport and  
103 metabolism) compared to the genome reference, although this last category tended to be under-  
104 represented at 16 hpi (**Figure 1B**). Comparatively, highly down-regulated genes were assigned  
105 to COG E and COG F (amino-acid and nucleotide transport and metabolism respectively)  
106 (**Figure 1B**).

107 When comparing *M. abscessus* Ac-16hpi vs. M $\phi$ -16hpi transcriptomes, DEGs were found more  
108 dispersed, with 20% of DEGs regulated in the opposite direction (increased versus decreased  
109 and vice versa) (**Figure 1C**). The representation of DEG according to their FC highlighted that  
110 in Ac and M $\phi$  most DEGs showed low changes ( $FC < |2|$ ) 16 hpi (**Sup. Figure 2A**). In Ac, UP

111 regulated DEGs predominated in comparison with their behavior in a M $\phi$  environment (**Sup.**  
112 **Figure 2B**).

113 COG designations highlighted the differences between *M. abscessus* high DEGs in M $\phi$  and Ac  
114 (**Figure 1D**). COG O, which was over-represented in the *M. abscessus* highly up-regulated  
115 genes in Ac, was more frequently associated with highly down-regulated genes in M $\phi$  (**Figure**  
116 **1B-D**). By comparison, COG P (Inorganic ion transport and metabolism) was over-represented  
117 in the *M. abscessus* transcriptome in M $\phi$  only, potentially illustrating different adaptations to  
118 amoebal and M $\phi$  environments (**Figure 1D**).

119

120 *Main biological pathway changes of M. abscessus in Ac and M $\phi$*

121 We performed a gene ontology enrichment (GOE) analysis to further characterize the  
122 *M. abscessus* adaptations in Ac and M $\phi$ . GOE were qualified by an enrichment factor (EF) (1 to  
123 4) and a number of significantly enriched genes (from small (<10) to large (>100)) (**Figure 2**).  
124 In Ac, the most enriched up-regulated *M. abscessus* genes fell into polyamine transport  
125 (GO:0015846) to adenine salvage (GO:0006168), including small groups of genes involved in  
126 sulfur metabolism (sulfate assimilation pathway (SAP) (GO:0000103), hydrogen sulfide (H<sub>2</sub>S)  
127 biosynthetic pathway (GO:0070814) and detoxification (iron-sulfur cluster assembly  
128 (GO:0016226) (**Figure 2A**).

129 In M $\phi$ , *M. abscessus* up-regulated enriched genes fall into different GO in comparison to those  
130 up-regulated in Ac. L-proline biosynthetic process (GO:0055129); methylerythritol 4-  
131 phosphate MEP pathway (GO:0019288) and Glycerol ether metabolic process (GO:0006662)  
132 were the most enriched (**Figure 2B**). These GO are followed by the type II secretion system  
133 and notably the Tat (twin-arginine translocation) pathway.

134 In Ac *M. abscessus* infections, the most enriched down-regulated genes fell into the nitrate  
135 assimilation GO (GO:0042128), to glycogen biosynthetic process GO (GO:0005978) (**Figure**

136 **2C**). In particular GO related to transport and metabolism of glucose were enriched  
137 (GO:0005977, GO:00015749, GO:0009250, GO:0005978) (**Figure 2C**).

138 In M $\phi$ , *M. abscessus* down-regulated genes related to growth and parietal activities. From  
139 GO:0040007 corresponding to growth, up to GO:0030259 corresponding to lipid glycosylation,  
140 in addition to GO:0071941 (nitrogen cycle metabolism process), GO:0009259 (peptidoglycan  
141 synthesis) and GO:0022604 (regulation of cell morphogenesis), GOE indicated that  
142 *M. abscessus* slows down its energy-lycost metabolic processes and growth rate (**Figure 2D**).  
143 Taken together, these observations suggest that *M. abscessus* enters a slow-replicative state in  
144 M $\phi$  and dedicates its energy to detoxification and protein secretion into the host.

145

146 *Regulation of the central carbon metabolism of M. abscessus in Ac and M $\phi$*

147 Following the GOE analysis, we investigated the different *M. abscessus* up- and down-  
148 regulated genes from metabolic pathways in Ac or M $\phi$ . The major finding was that  
149 *M. abscessus* switches from a simple sugar-based carbon source to fatty acids inside Ac and  
150 M $\phi$  (**Figure 3**). The glycolysis/neoglucogenesis and pentose phosphate pathways were mostly  
151 down-regulated or unchanged inside cells whereas the  $\beta$ -oxidation of fatty acids was up-  
152 regulated in Ac and M $\phi$ . This switch was observed from the early time points after Ac infection.  
153 Fifteen genes predicted to encode enzymes necessary for the biochemical activation and  $\beta$ -  
154 oxidation of fatty acids were up-regulated in Ac and M $\phi$ , such as: fatty acid-coenzyme A (CoA)  
155 synthase (*fadD3*, 9, 10, 19); acyl-CoA dehydrogenase (*fadE5*, 14, 23-24, 27-29, 31); enoyl-  
156 CoA hydratase (*echA19*); hydroxy-butryl-CoA dehydrogenase (*fadB2*) and acetyl-CoA  
157 transferase (*fadA5*, 6). Genes implicated in the synthesis of enzymes involved in the breakdown  
158 of cholesterol A and B rings were highly induced in Ac and M $\phi$ .  $\beta$ -oxidation of fatty acid and  
159 cholesterol breakdown result in the accumulation of propionyl-CoA that is detoxified by the  
160 methylmalonyl pathway. By-products of these 3 pathways and the GABA shunt feed the TCA

161 cycle. The succinate generated by the TCA cycle enables the bacterium to deal with anaerobic  
162 respiration (Hartman et al., 2014). In addition, *M. abscessus* may detoxify glyoxylate by  
163 converting it into malate via the glyoxylate shunt (**Figure 3**).  
164 Furthermore, down-regulation of the mycolate operon (*MAB\_2027-MAB\_2039*) (**Table 1**),  
165 encompassing the  $\beta$ -ketoacyl-ACP synthases (KasA & KasB) and  $\beta$ -ketoacyl synthases  
166 (*MAB\_2031* & *MAB\_2029*), as well as the malonyl-CoA acyl carrier protein transacylase  
167 (MCAT) homolog (*MAB\_2034*), revealed that intracellular *M. abscessus* undergoes starvation  
168 as previously described (Jamet et al., 2015).

169

#### 170 *Regulation of putative virulence genes of M. abscessus in Ac and M $\phi$*

171 We assessed the regulation of *M. abscessus* genes conserved in *M. tuberculosis* that are known  
172 to be induced and to contribute to the cellular microbicidal defenses of the tubercle bacillus in  
173 M $\phi$  (Mukhopadhyay et al., 2012). The picture looked similar between Ac and M $\phi$  with a few  
174 exceptions in the response to low O<sub>2</sub>/NO and in the low iron response (**Figure 4**).  
175 Transcriptional regulators such as *dosR*, *phoP* and *mtrA* were regulated in the opposite direction  
176 in Ac and M $\phi$ , with *phoP* and *mtrA* only induced in Ac, and *dosR* exclusively induced in M $\phi$ .  
177 Other genes known to contribute to the survival of the bacterium in response to oxidative stress  
178 (Sherman et al., 1999), comprising *ahpD*, *bcp*, *trxB1* and 2, *trxC* genes (Schnappinger et al.,  
179 2003), in addition to *ahpC*, were up-regulated in Ac and M $\phi$ .

180 Altogether, these analyses suggest that the induced sets of genes in Ac reflect the main  
181 adaptations to resistance to intracellular stress that were also shown to be induced in M $\phi$ , hence  
182 suggesting that they constitute a repertoire of genes participating in *M. abscessus* virulence  
183 through intra-phagocyte survival.

184

185 *M. abscessus highly-induced genes in amoeba*



186 The highest FC values of the *M. abscessus* in Ac 4 and 16hpi were chosen and then compared  
187 to the FC values obtained from the *M. abscessus* transcriptomes in M $\phi$  and the *M. chelonae*  
188 transcriptome in Ac (**Sup. Figure 3**). This comparison highlighted 45 *M. abscessus* genes (**Sup.**  
189 **Table 2**). We also listed the most induced genes in M $\phi$  (38 genes) (**Sup. Table 3**). From the  
190 comparison with the Ac transcriptomes, we constructed deletion mutants in 6 loci ( $\Delta$ OP1 to  
191  $\Delta$ OP6) (**Table 3**). From the *M. abscessus* transcriptome in M $\phi$  we constructed deletion mutants  
192 in 5 loci ( $\Delta$ OP 7 to  $\Delta$ OP11) among the most induced genes or in genes implicated in the  
193 adaptation to intracellular stress (**Table 3**).

194  $\Delta$ OP1 to  $\Delta$ OP6 strains were evaluated for their intracellular multiplication in Ac and in M $\phi$   
195 (**Figure 5A**). All mutants were attenuated in Ac and M $\phi$ , except one ( $\Delta$ OP5), which multiplied  
196 more than the wild-type (wt) strain in M $\phi$  (**Figure 5A**). All mutated strains had similar growth  
197 *in vitro* to the wild type strain (**Sup. Figure 4A**).  $\Delta$ OP2, 3, 4 and 6 were complemented and all  
198 strains recovered the wt phenotype except for the OP4 gene *MAB\_2650* potentially encoding  
199 an MmpL (**Sup. Figure 4B**).

200 These experiments confirmed the importance of these highly induced genes in Ac, in the intra-  
201 M $\phi$  survival of *M. abscessus*. Several genes (OP2 and 6) are absent from *M. chelonae*, or  
202 present in the *M. chelonae* genome but at least four times less induced (OP3 and OP4) in Ac.  
203 We have analyzed their contribution towards intracellular survival by overexpressing  
204 *M. abscessus* OP2, 3, 6 and *MAB\_2649* genes in *M. chelonae* (**Figure 5B, left panel**), which is  
205 unable to survive in M $\phi$  (Sousa et al., 2015). Only the overexpression of *M. abscessus* OP3 and  
206 OP4 (*MAB\_2649*) increased *M. chelonae* survival in M $\phi$  (**Figure 5B, right panel**). By  
207 comparison, no increase in *M. chelonae* intracellular survival was observed when  
208 overexpressing OP2 and OP6 (**Figure 5B, right panel**).

209

210 *M. abscessus* highly-induced genes in M $\phi$

211 The observed defect in intracellular survival was noticed for all mutants from OP7 to OP11  
212 (**Figure 5A**), the  $\Delta$ OP11 mutant was particularly attenuated (GI<0.1). OP11 (*MAB\_4532c*) KO  
213 strain tended to be eliminated by M $\phi$  while the KO growth was similar to the WT growth *in*  
214 *vitro* (**Sup. Figure 4**). When complementing  $\Delta$ OP11 strain with *MAB\_4532c*, we restored the  
215 wt phenotype (**Figure 6A**). *MAB\_4532c* encodes an Eis N-acetyl transferase protein, according  
216 to a motif analysis (InterProScan 5). Of interest, *M. abscessus* contains two *eis* genes, named  
217 *eis1<sub>MAB</sub>* (*MAB\_4124*) and *eis2<sub>MAB</sub>* (*MAB\_4532c*) while *M. tuberculosis* possesses a single *eis<sub>MTB</sub>*  
218 gene (*Rv2416c*), *eis1<sub>MAB</sub>* (*MAB\_4124*) being the closest homolog by Bidirectional Best Hit  
219 (BBH) search. No conservation of synteny was observed between the respective genomic  
220 regions in *M. abscessus* and *M. tuberculosis* (**Sup. Figure 5A**). In contrast, the *eis2<sub>MAB</sub>* locus  
221 shows some similarity and conservation with the *M. tuberculosis mmpL11* locus, with inverted  
222 and syntenic conservation of groups of genes (**Sup. Figure 5B**). The *eis<sub>MTB</sub>* locus was well-  
223 conserved in *M. abscessus* and corresponds to *MAB\_1619-MAB\_1627* and *MAB\_1633-*  
224 *MAB\_1637* regions (**Sup. Figure 5C**). Both *eis1<sub>MAB</sub>* and *eis2<sub>MAB</sub>* were found close to *mmpL*  
225 (brown arrows) and/or *mmpS* (orange arrow) genes (**Sup. Figure 5**). In the *M. abscessus eis2*  
226 locus, an *mmpL* gene (*MAB\_4529*) was conserved in *M. tuberculosis* corresponding to *mmpL11*  
227 (**Sup. Figure 5B**). To assess the function of *M. abscessus eis* genes we performed  
228 transcomplementation of KO strains ( $\Delta$ *eis1<sub>MAB</sub>* and  $\Delta$ *eis2<sub>MAB</sub>*) with *M. tuberculosis eis* (*eis<sub>MTB</sub>*).  
229 Of interest, and unlike *eis2<sub>MAB</sub>*, *eis1<sub>MAB</sub>* was suppressed inside M $\phi$  (**Sup. Figure 6**) and less  
230 impaired in its intracellular survival (**Figures 6A-B**). Complementation of  $\Delta$ *eis1<sub>MAB</sub>* and  
231  $\Delta$ *eis2<sub>MAB</sub>* with *eis1<sub>MAB</sub>* or *eis2<sub>MAB</sub>* respectively allowed the recovery of the intracellular survival  
232 for both mutants (**Figures 6A-B**). However, complementation of both mutants with the *eis<sub>MTB</sub>*  
233 gene allowed only partial restoration of the intracellular replicative phenotype for the  $\Delta$ *eis2<sub>MAB</sub>*  
234 mutant, but no restoration was observed for  $\Delta$ *eis1<sub>MAB</sub>* mutant (**Figure 6A-B**). Similar behaviors  
235 regarding apoptosis, necrosis, autophagy and phagosomal acidification were observed when

236 comparing the wt *M. abscessus* strain with the  $\Delta eis2_{MAB}$  mutant (**Sup. Figure 7**). However, two  
237 major differences were observed. First, infection of M $\phi$  with the  $\Delta eis2_{MAB}$  strain (at a MOI of  
238 50) was associated with higher production of ROS by the cells and loss of *eis2<sub>MAB</sub>* also  
239 sensitized *M. abscessus* to ROS and notably to H<sub>2</sub>O<sub>2</sub> (**Figures 6C-D**). Secondly, the  $\Delta eis2_{MAB}$   
240 mutant was unable to damage the phagosomal membrane and to provoke phagosome-cytosol  
241 contact as compared to the wt and complemented *M. abscessus* strains (**Figure 6E**).

242

## 243 **Discussion**

244 The main objective of this work was to understand the genetic and molecular basis for the  
245 ability of *M. abscessus* to withstand and survive in eukaryotic phagocytic cells. Identification  
246 of genes strongly induced after infection of Ac allowed us to reveal those genes that play key  
247 roles in M $\phi$  intracellular survival. Conversely, identification of genes strongly induced after  
248 infection of M $\phi$  allowed us to reveal those essential to Ac intracellular survival with the  
249 exception of one mutant, OP5 (*MAB\_4663*) encoding a protein of unknown function, that  
250 showed enhanced growth in M $\phi$ . KO mutants constructed on the basis of the results from  
251 transcriptomic analyses allowed the identification of genes required for bacterial survival in  
252 phagocytes. These results are complementary to a previous *Tn M. abscessus* library viability  
253 screen in Ac, permitting the identification of two other intracellular virulence factors, namely  
254 the type VII secretion system ESX4 and the lipid transport protein MmpL8<sub>MAB</sub> (Dubois et al.,  
255 2018b; Laencina et al., 2018). The intracellular defects of strains that were deleted for genes  
256 highly induced in amoeba (induced at least four times more compared to the intramacrophagic  
257 transcriptome of *M. abscessus* and to the intra-amoebal transcriptome of *M. chelonae* (OP1 to  
258 OP6)), suggest that the transcriptomic changes observed following a co-culture in amoebae  
259 reflected the response of *M. abscessus* in M $\phi$ . In addition, co-culturing *M. abscessus* in  
260 amoebae enhances the virulence of *M. abscessus* even *in vivo* through the induction of the PLC  
261 virulence gene (Bakala N’Goma *et al.*, 2015). These transcriptomic analyses highlight that  
262 exposure to the amoebal intracellular environment potentiates *M. abscessus* virulence,  
263 increasing the resistance of the bacteria for future encounters with phagocytic cells that form  
264 part of the innate defense of the host.

265 Most of the 6 loci (OP1 to OP6) studied encode for hypothetical proteins, with the exception of  
266 the *MAB\_1517c* gene that encodes a probable O-methyltransferase (OP3), and the *MAB\_2649*  
267 and *MAB\_2650* genes encoding an MmpS and an MmpL, respectively (OP4) (**Table 2**) (Viljoen

268 et al., 2017). At the *M. abscessus* OP2 locus, that mainly comprises genes of unknown function,  
269 we used a motif analysis to identify an ABC transporter, FecCD/TroCD-like in the MAB\_1243c  
270 protein and an alkaline shock protein Asp23 in the MAB\_1247c protein. A motif analysis  
271 performed on *M. abscessus* OP6 gene shows that *MAB\_4791c* encodes a protein implicated in  
272 the twin-arginine translocation pathway (see below). Notably, the over-induction of *MAB\_2649*  
273 and *MAB\_1517c* in *M. chelonae* favors its replication in M $\phi$ , suggesting that the high induction  
274 of these two genes in amoeba may trigger *M. abscessus* virulence.

275 A striking finding of our work is the essential role of the *eis2<sub>Mab</sub>* gene in early resistance to the  
276 microbicidal action of M $\phi$ , via phagosomal membrane damage and cytosol contact, that allows  
277 the intracellular survival of *M. abscessus*. Although *M. abscessus* possesses two *Eis* genes,  
278 there is no redundancy in their respective functions; the *eis1<sub>Mab</sub>* mutant presented a similar  
279 behavior to the wt strain in M $\phi$ , with only the loss of a log<sub>10</sub> CFU at 5 dpi, compared to the  
280 quasi-total clearance of the *eis2<sub>Mab</sub>* mutant in M $\phi$ . Despite higher genomic identity between  
281 *eis1<sub>MAB</sub>* and *eis<sub>MTB</sub>*, the restoration of the phenotype when complemented with *eis<sub>MTB</sub>* was  
282 observed only for the *eis2<sub>MAB</sub>* mutant, demonstrating the similar role of *eis2<sub>MAB</sub>* to what is  
283 described for *eis<sub>MTB</sub>* in virulence. However the deletion of this gene in *M. abscessus* is more  
284 deleterious for the bacterium in M $\phi$  compared to the deletion of *eis<sub>MTB</sub>*, (Wei *et al.*, 2000; Wu  
285 *et al.*, 2009). *Eis<sub>MTB</sub>* gene has been described as being important for *M. tuberculosis* survival  
286 inside M $\phi$  by controlling host cell apoptosis, autophagy, ROS production and innate immune  
287 defenses (Shin *et al.*, 2010). As also observed in *M. tuberculosis* (Shin *et al.*, 2010), increasing  
288 the MOI (to 50) revealed further differences between *eis2<sub>MAB</sub>* KO and wt strains with regard to  
289 resistance to oxidized derivatives; however, this bacterial-load effect has not yet been observed  
290 for cell death mechanisms.

291 One of the peculiarities of the locus *eis2<sub>MAB</sub>* is to possess similarities with a genomic region of  
292 *M. tuberculosis*, within which is found the gene *mmpL11*. The potential counterpart in

293 *M. abscessus* would be *MAB\_4529* (**Sup. Figure 5**). Most of MmpL are lipid transporters  
294 implicated in cell physiology and virulence (Chalut, 2016; Viljoen et al., 2017). *M. abscessus*  
295 has 27 MmpLs, twice as much as *M. tuberculosis* (Viljoen et al., 2017). In *M. tuberculosis*,  
296 MmpL11 is implicated in heme iron acquisition (Owens et al., 2013) and transport of mycolic  
297 acid wax ester and long-chain triacylglycerols (Wright et al., 2017). Three genes conserved in  
298 the *M. abscessus eis2* locus encode for proteins belonging to lipid transport and metabolism  
299 pathways (COG I), which suggests, together with the conservation seen with the *M.*  
300 *tuberculosis mmpL11* locus, that the *M. abscessus eis2* locus might also participate in cell wall  
301 biogenesis (Yamaryo-Botte et al., 2015).

302 Transcriptomic analysis revealed that nine *M. abscessus* genes, whose orthologues in  
303 *M. tuberculosis* contribute to virulence, were highly induced during infection of M $\phi$  (**Sup.**  
304 **Table 2**). Among their gene products, WhiB7 and DevR-DevS are implicated in stress sensing  
305 (Kumar et al., 2011). WhiB7, a Fe-S cluster protein, was shown to be induced in response to  
306 perturbation in amino-acid metabolism, under reducing intracellular state, iron depletion and  
307 increased temperatures (Geiman et al., 2006). The 20-fold increase of *M. abscessus whiB7* in  
308 M $\phi$  suggests that *M. abscessus* may undergo similar stresses in M $\phi$ . The DevR response  
309 regulator of the histidine kinase DevS was also highly up-regulated. In *M. tuberculosis*, the  
310 *devR-devS* two-component system (also known as the DosR system) is activated in response to  
311 hypoxia (Sherman et al., 2001). Likewise, *M. abscessus MAB\_2562c*, the orthologue of  
312 *Rv0081*, was induced 10-fold in M $\phi$ . A putative orthologue (*MAB\_1409c*) of the dormancy  
313 response gene *Rv1258c* was also strongly induced in intra-macrophagic *M. abscessus*. The  
314 conserved alpha-ketoglutarate-dependent dioxygenase AlkB-encoding gene is thought to be  
315 involved in fatty acid metabolism, or in protection against DNA methylation. The *aspC* gene  
316 was induced 8-fold; AspC mediates nitrogen transfer from aspartate to glutamate, which in turn,  
317 together with glutamine, provides nitrogen to most of the biosynthesis pathways. This is thought

318 to be essential in *M. tuberculosis* (Sasseti et al., 2003), while aspartate is required for  
319 mycobacterial virulence (Gouzy et al., 2013). *M. abscessus katA* gene, which is conserved in  
320 *M. avium* and *Listeria monocytogenes*, is a catalase that degrades H<sub>2</sub>O<sub>2</sub> into water and oxygen  
321 in a single reaction. Such a reaction, enabling resistance to oxidative metabolites, may be an  
322 important mechanism of bacillary survival within the host phagocyte (Manca et al., 1999).  
323 *M. abscessus eamA* (*MAB\_0677c*), which is thought to encode a drug/metabolite transporter,  
324 was induced in Mφ. Two additional genes (*MAB\_3762* and *MAB\_3180*) encoding proteins with  
325 an EamA domain were also highly induced. Finally, at the molecular function level, it appears  
326 that six of the most highly induced genes in *M. abscessus* in Mφ encode acyl or N-acetyl  
327 transferase proteins playing a role in post-translational modifications.

328 The *M. abscessus* transcriptomes' comparison in Ac or Mφ allowed differences in metabolic  
329 adaptations to be highlighted. In Mφ, *M. abscessus* enters a slow replicative stage, and activates  
330 the detoxification and protein secretion pathways. By comparison, in amoebae *M. abscessus*  
331 switches on protein synthesis, lipid transport and metabolism, transcription of genes involved  
332 in post-translational modifications (PTM), protein turnover and chaperones (COG O),  
333 reflecting a more active and replicative behavior as compared to a more persistent state in Mφ.  
334 Actually, cell wall biogenesis including peptidoglycan and glycosaminoglycan biosynthetic  
335 processes were down-regulated in Mφ. Similarly, *mtrA*, *phoP* and *devR* were differently  
336 regulated, with only *devR* up-regulated in Mφ, confirming the switch towards a slow growth  
337 stage for *M. abscessus* in Mφ.

338 Over-representation of the COG O (post-translational modification, protein turnover, molecular  
339 chaperone) category in *M. abscessus* infecting Ac indicates that *M. abscessus* may alter cellular  
340 processes during its interactions with host cells via PTM, as described in various pathogens  
341 (Ribet and Cossart, 2010; Müller et al., 2010; Parra et al., 2017). Protein turnover does not only  
342 help in clearing of old proteins but also aids a fast adaptation to nutrient poor environments

343 (Goldberg and St. John, 1976). Molecular chaperones help pathogens override unfavorable  
344 conditions found in the host such as heat shock, oxidative and acid stresses (Neckers and Tatu,  
345 2008). They also contribute to the inhibition of lysosomal fusion and favor bacterial growth  
346 (Neckers and Tatu, 2008). Molecular chaperones may therefore form a first line of defense and  
347 help consolidate pathogen virulence. Thus, over-representation of the COG O inside amoebae  
348 might reflect specific intracellular cues the mycobacterium faced from the early time points  
349 post infection.

350 In Ac, the most enriched GO is adenine salvage (GO:0006168) (**Figure 2**). This GO represents  
351 any process that generates adenine from derivatives without any *de novo* synthesis.  
352 Mycobacteria are able to limit the synthesis of this high energy demanding nucleotide (Ducati  
353 et al., 2011). Mycobacteria are also capable of scavenging free nitrogenous bases from the  
354 medium (Ducati et al., 2011). Under conditions of low energy availability or rapid  
355 multiplication, the salvage pathway may then be the main source of maintaining the nucleotide  
356 pool (Ducati et al., 2011).

357 Sulfur metabolism (GO:0000103), hydrogen sulfide (H<sub>2</sub>S) biosynthetic pathway (GO:0070814)  
358 and detoxification via Fe-S cluster assembly proteins (GO:0016226) in addition to polyamine  
359 transport (GO:0015846), were also enriched by *M. abscessus* in Ac. In its reduced form, sulfur  
360 is used in the biosynthesis of the amino acid cysteine that is one of the prime targets for reactive  
361 nitrogen intermediates (Rhee et al., 2005). Those pathways might play a key role in  
362 *M. abscessus* survival in phagocytic cells, since genes involved in the metabolism of sulfur  
363 have consistently been identified as up-regulated in conditions that mimic the intra-  
364 macrophagic environment and during M $\phi$  infection for *M. tuberculosis* (Schnappinger *et al.*,  
365 2003). As for polyamines (cadaverine, putrescine and spermidine), they are known to have  
366 pleiotropic effects on cells via: their interaction with nucleic acids; a role in bacterial virulence



367 by allowing mycobacterial escape from the phagolysosome; toxin activity or protection from  
368 oxidative and acid stress has also been demonstrated (Shah and Swiatlo, 2008).

369 In M $\phi$ , glycerol ether metabolic process, MEP pathway and L-proline biosynthetic processes  
370 were the most enriched. Glycerol ether metabolic process corresponds to glycerophospholipids-  
371 seminolipids-plasmecholine metabolism and cellular amide biosynthetic processes. The MEP  
372 pathway is required for isoprenoid precursor biosynthesis (Rohmer et al., 1993). A wide variety  
373 of monoterpenes and diterpenes belong to isoprenoid classes which function as toxins, growth  
374 inhibitors, or other secondary metabolites (Gershenzon and Dudareva, 2007). Finally, proline  
375 has been reported as an important factor in the adaptation of mycobacteria to slow growth rate  
376 and hypoxia (Berney *et al.*, 2012). It is believed that the proline-utilization pathway protects  
377 mycobacterial cells by detoxifying methylglyoxal, a by-product of endogenous glycerol  
378 metabolism (Berney *et al.*, 2012) that can damage DNA and proteins within cells. Up-regulation  
379 of base-excision repair suggests that intracellular mycobacteria undergo DNA damage. Protein  
380 folding was also enriched, as well as the type II secretion system, which was enriched by more  
381 than two-fold. This secretion system promotes the specific transport of folded periplasmic  
382 proteins across a dedicated channel in the outer membrane, and it facilitates both Sec and Tat  
383 pathways to secrete proteins into the periplasm. Potential roles for SecA1 and SecA2 in *M.*  
384 *tuberculosis* dormancy has been reported while the Tat pathway was shown to contribute to  
385 virulence in *Legionella pneumophila* for instance, by aiding secretion of Phospholipase C  
386 (Rossier and Cianciotto, 2005), a virulence factor conserved in *M. abscessus* (Ripoll *et al.*,  
387 2009).

388 Both Ac and M $\phi$  were sensed as a stressful environment by *M. abscessus*, evidenced by the up-  
389 regulation of genes known to be involved in multiple stress responses. Induction of low O<sub>2</sub> and  
390 low NO response genes confirm that hypoxic environments are encountered by *M. abscessus*  
391 both in Ac and M $\phi$ .

392 In conclusion, our findings confirm that the amoeba-induced genes play a role in potentiating  
393 the subsequent survival of *M. abscessus* in M $\phi$ . Both environments have commonalities, in  
394 terms of metabolic switches, especially to withstand the host response. It is through this  
395 preparation during its intra-amoebic life that *M. abscessus* is able to withstand the noxious M $\phi$   
396 environment, especially thanks to several genes whose role has been confirmed during this  
397 work. The multiple leads opened during this work must now be followed to complete this  
398 viewpoint of synergistic potentiation of virulence conferred by the amoeba to *M. abscessus*,  
399 including the ultimate mechanisms of manipulation of the host's defense systems as seen with  
400 other intracellular pathogens.

401

402 REFERENCES

- 403 Adékambi T, Ben Salah S, Khlif M, Raoult D, Drancourt M. 2006. Survival of environmental  
404 mycobacteria in *Acanthamoeba polyphaga*. *Appl Environ Microbiol* **72**:5974–5981.  
405 doi:10.1128/AEM.03075-05
- 406 Ahmed N, Saini V, Raghuvanshi S, Khurana JP, Tyagi AK, Tyagi AK, Hasnain SE. 2007.  
407 Molecular Analysis of a Leprosy Immunotherapeutic *Bacillus* Provides Insights into  
408 Mycobacterium Evolution. *PLoS One* **2**:e968. doi:10.1371/journal.pone.0000968
- 409 Angenent LT, Kelley ST, St Amand A, Pace NR, Hernandez MT. 2005. Molecular identification  
410 of potential pathogens in water and air of a hospital therapy pool. *Proc Natl Acad Sci U*  
411 *S A* **102**:4860–5. doi:10.1073/pnas.0501235102
- 412 Bakala N’Goma JC, Le Moigne V, Soismier N, Laencina L, Le Chevalier F, Roux A-L, Poncin I,  
413 Serveau-Avesque C, Rottman M, Gaillard J-L, Etienne G, Brosch R, Herrmann J-L, Canaan  
414 S, Girard-Misguich F. 2015. Mycobacterium abscessus phospholipase C expression is  
415 induced during coculture within amoebae and enhances M. abscessus virulence in mice.  
416 *Infect Immun* **83**:780–791. doi:10.1128/IAI.02032-14
- 417 Barker J, Brown MRW. 1994. Trojan Horses of the microbial world: protozoa and the survival  
418 of bacterial pathogens in the environment. *Microbiology* **140**:1253–1259.  
419 doi:10.1099/00221287-140-6-1253
- 420 Ben Salah I, Adékambi T, Drancourt M. 2009. Mycobacterium phocaicum in therapy pool  
421 water. *Int J Hyg Environ Health* **212**:439–444. doi:10.1016/j.ijheh.2008.10.002
- 422 Benjamini, Hochberg. 1995. Controlling the False Discovery Rate: A Practical and Powerful  
423 Approach to Multiple Testing. *J R Stat Soc Ser B* **57**:289–300.

- 424 Berney M, Weimar MR, Heikal A, Cook GM. 2012a. Regulation of proline metabolism in  
425 mycobacteria and its role in carbon metabolism under hypoxia. *Mol Microbiol* **84**:664–  
426 81. doi:10.1111/j.1365-2958.2012.08053.x
- 427 Berney M, Weimar MR, Heikal A, Cook GM. 2012b. Regulation of proline metabolism in  
428 mycobacteria and its role in carbon metabolism under hypoxia. *Mol Microbiol* **84**:664–  
429 681. doi:10.1111/j.1365-2958.2012.08053.x
- 430 Chalut C. 2016. MmpL transporter-mediated export of cell-wall associated lipids and  
431 siderophores in mycobacteria. *Tuberculosis (Edinb)* **100**:32–45.  
432 doi:10.1016/j.tube.2016.06.004
- 433 Cirillo JD, Falkow S, Tompkins LS, Bermudez LE. 1997. Interaction of *Mycobacterium avium*  
434 with environmental amoebae enhances virulence. *Infect Immun* **65**:3759–67.
- 435 Dubois V, Laencina L, Bories A, Le Moigne V, Pawlik A, Herrmann J-L, Girard-Misguich F.  
436 2018a. Identification of Virulence Markers of *Mycobacterium abscessus* for Intracellular  
437 Replication in Phagocytes. *J Vis Exp*. doi:10.3791/57766
- 438 Dubois V, Viljoen A, Laencina L, Le Moigne V, Bernut A, Dubar F, Blaise M, Gaillard J-L,  
439 Guérardel Y, Kremer L, Herrmann J-L, Girard-Misguich F. 2018b. MmpL8MAB controls  
440 *Mycobacterium abscessus* virulence and production of a previously unknown glycolipid  
441 family. *Proc Natl Acad Sci U S A* 201812984. doi:10.1073/pnas.1812984115
- 442 Ducati RG, Breda A, Basso LA, Santos DS. 2011. Purine Salvage Pathway in *Mycobacterium*  
443 tuberculosis. *Curr Med Chem* **18**:1258–75.
- 444 Eddyani M, De Jonckheere JF, Durnez L, Suykerbuyk P, Leirs H, Portaels F. 2008. Occurrence  
445 of free-living amoebae in communities of low and high endemicity for Buruli ulcer in  
446 southern Benin. *Appl Environ Microbiol* **74**:6547–53. doi:10.1128/AEM.01066-08

- 447 Falkinham JO. 2009. Surrounded by mycobacteria: nontuberculous mycobacteria in the  
448 human environment. *J Appl Microbiol* **107**:356–67. doi:10.1111/j.1365-  
449 2672.2009.04161.x
- 450 Geiman DE, Raghunand TR, Agarwal N, Bishai WR. 2006. Differential Gene Expression in  
451 Response to Exposure to Antimycobacterial Agents and Other Stress Conditions among  
452 Seven Mycobacterium tuberculosis whiB-Like Genes. *Antimicrob Agents Chemother*  
453 **50**:2836–2841. doi:10.1128/AAC.00295-06
- 454 Gershenzon J, Dudareva N. 2007. The function of terpene natural products in the natural  
455 world. *Nat Chem Biol* **3**:408–414. doi:10.1038/nchembio.2007.5
- 456 Goldberg AL, St. John AC. 1976. Intracellular Protein Degradation in Mammalian and  
457 Bacterial Cells: Part 2. *Annu Rev Biochem* **45**:747–804.  
458 doi:10.1146/annurev.bi.45.070176.003531
- 459 Gomila M, Ramirez A, Gasco J, Lalucat J. 2008. Mycobacterium llatzerense sp. nov., a  
460 facultatively autotrophic, hydrogen-oxidizing bacterium isolated from haemodialysis  
461 water. *Int J Syst Evol Microbiol* **58**:2769–2773. doi:10.1099/ijs.0.65857-0
- 462 Gouzy A, Poquet Y, Neyrolles O. 2013. A central role for aspartate in Mycobacterium  
463 tuberculosis physiology and virulence. *Front Cell Infect Microbiol* **3**:68.  
464 doi:10.3389/fcimb.2013.00068
- 465 Greub G, Raoult D. 2004. Microorganisms resistant to free-living amoebae. *Clin Microbiol*  
466 *Rev* **17**:413–33.
- 467 Griffith DE, Aksamit T, Brown-Elliott B a, Catanzaro A, Daley C, Gordin F, Holland SM,  
468 Horsburgh R, Huitt G, Iademarco MF, Iseman M, Olivier K, Ruoss S, von Reyn CF,  
469 Wallace RJ, Winthrop K. 2007. An official ATS/IDSA statement: diagnosis, treatment,

- 470 and prevention of nontuberculous mycobacterial diseases. *Am J Respir Crit Care Med*  
471 **175**:367–416. doi:10.1164/rccm.200604-571ST
- 472 Guidotti TL, Ragain L, de Haas P, van Soolingen D. 2008. Communicating with healthcare  
473 providers. *J Water Health* **6**:s53. doi:10.2166/wh.2008.032
- 474 Gutierrez MC, Brisse S, Brosch R, Fabre M, Omais B, Marmiesse M, Supply P, Vincent V. 2005.  
475 Ancient Origin and Gene Mosaicism of the Progenitor of *Mycobacterium tuberculosis*.  
476 *PLoS Pathog* **1**:e5. doi:10.1371/journal.ppat.0010005
- 477 Hartman T, Weinrick B, Vilchèze C, Berney M, Tufariello J, Cook GM, Jacobs WR, Jr. 2014.  
478 Succinate dehydrogenase is the regulator of respiration in *Mycobacterium tuberculosis*.  
479 *PLoS Pathog* **10**:e1004510. doi:10.1371/journal.ppat.1004510
- 480 Jamet S, Quentin Y, Coudray C, Texier P, Laval F, Daffé M, Fichant G, Cam K. 2015. Evolution  
481 of Mycolic Acid Biosynthesis Genes and Their Regulation during Starvation in  
482 *Mycobacterium tuberculosis*. *J Bacteriol* **197**:3797–811. doi:10.1128/JB.00433-15
- 483 Kumar A, Farhana A, Guidry L, Saini V, Hondalus M, Steyn AJC. 2011. Redox homeostasis in  
484 mycobacteria: the key to tuberculosis control? *Expert Rev Mol Med* **13**:e39.  
485 doi:10.1017/S1462399411002079
- 486 Laencina L, Dubois V, Le Moigne V, Viljoen A, Majlessi L, Pritchard J, Bernut A, Piel L, Roux A-  
487 L, Gaillard J-L, Lombard B, Loew D, Rubin EJ, Brosch R, Kremer L, Herrmann J-L, Girard-  
488 Misguich F. 2018. Identification of genes required for *Mycobacterium abscessus* growth  
489 in vivo with a prominent role of the ESX-4 locus. *Proc Natl Acad Sci* **115**:E1002–E1011.  
490 doi:10.1073/pnas.1713195115
- 491 Lamrabet O, Medie FM, Drancourt M. 2012. *Acanthamoeba polyphaga*-enhanced growth of  
492 *mycobacterium smegmatis*. *PLoS One* **7**. doi:10.1371/journal.pone.0029833

- 493 Lavania M, Katoch K, Katoch VM, Gupta AK, Chauhan DS, Sharma R, Gandhi R, Chauhan V,  
494 Bansal G, Sachan P, Sachan S, Yadav VS, Jadhav R. 2008. Detection of viable  
495 Mycobacterium leprae in soil samples: Insights into possible sources of transmission of  
496 leprosy. *Infect Genet Evol* **8**:627–631. doi:10.1016/j.meegid.2008.05.007
- 497 Le Moigne V, Belon C, Goulard C, Accard G, Bernut A, Pitard B, Gaillard J-L, Kremer L,  
498 Herrmann J-L, Blanc-Potard A-B. 2016. MgtC as a Host-Induced Factor and Vaccine  
499 Candidate against Mycobacterium abscessus Infection. *Infect Immun* **84**:2895–2903.  
500 doi:10.1128/IAI.00359-16
- 501 Love MI, Huber W, Anders S. 2014. Moderated estimation of fold change and dispersion for  
502 RNA-seq data with DESeq2. *Genome Biol* **15**:550. doi:10.1186/s13059-014-0550-8
- 503 Manca C, Paul S, Barry CE, Freedman VH, Kaplan G, Kaplan G. 1999. Mycobacterium  
504 tuberculosis catalase and peroxidase activities and resistance to oxidative killing in  
505 human monocytes in vitro. *Infect Immun* **67**:74–9.
- 506 Medjahed H, Singh AK. 2010. Genetic manipulation of Mycobacterium abscessus. *Curr Protoc*  
507 *Microbiol* **Chapter 10**:Unit 10D.2. doi:10.1002/9780471729259.mc10d02s18
- 508 Mukhopadhyay S, Nair S, Ghosh S. 2012. Pathogenesis in tuberculosis: transcriptomic  
509 approaches to unraveling virulence mechanisms and finding new drug targets. *FEMS*  
510 *Microbiol Rev* **36**:463–485. doi:10.1111/j.1574-6976.2011.00302.x
- 511 Müller MP, Peters H, Blümer J, Blankenfeldt W, Goody RS, Itzen A. 2010. The Legionella  
512 effector protein DrrA AMPylates the membrane traffic regulator Rab1b. *Science*  
513 **329**:946–9. doi:10.1126/science.1192276
- 514 Neckers L, Tatu U. 2008. Molecular chaperones in pathogen virulence: emerging new targets  
515 for therapy. *Cell Host Microbe* **4**:519–27. doi:10.1016/j.chom.2008.10.011

- 516 Owens CP, Chim N, Graves AB, Harmston CA, Iniguez A, Contreras H, Liptak MD, Goulding  
517 CW. 2013. The mycobacterium tuberculosis secreted protein Rv0203 transfers heme to  
518 membrane proteins MmpL3 and MmpL11. *J Biol Chem* **288**:21714–21728.  
519 doi:10.1074/jbc.M113.453076
- 520 Pagnier I, Raoult D, La Scola B. 2008. Isolation and identification of amoeba-resisting bacteria  
521 from water in human environment by using an *Acanthamoeba polyphaga* co-culture  
522 procedure. *Environ Microbiol* **10**:1135–1144. doi:10.1111/j.1462-2920.2007.01530.x
- 523 Parra J, Marcoux J, Poncin I, Canaan S, Herrmann JL, Nigou J, Burette-Schiltz O, Rivière M.  
524 2017. Scrutiny of *Mycobacterium tuberculosis* 19 kDa antigen proteoforms provides  
525 new insights in the lipoglycoprotein biogenesis paradigm. *Sci Rep* **7**:43682.  
526 doi:10.1038/srep43682
- 527 Rhee KY, Erdjument-Bromage H, Tempst P, Nathan CF. 2005. S-nitroso proteome of  
528 *Mycobacterium tuberculosis*: Enzymes of intermediary metabolism and antioxidant  
529 defense. *Proc Natl Acad Sci* **102**:467–472. doi:10.1073/pnas.0406133102
- 530 Ribet D, Cossart P. 2010. Pathogen-Mediated Posttranslational Modifications: A Re-emerging  
531 Field. *Cell* **143**:694–702. doi:10.1016/J.CELL.2010.11.019
- 532 Ripoll F, Pasek S, Schenowitz C, Dossat C, Barbe V, Rottman M, Macheras E, Heym B,  
533 Herrmann J-L, Daffé M, Brosch R, Risler J-L, Gaillard J-L. 2009. Non mycobacterial  
534 virulence genes in the genome of the emerging pathogen *Mycobacterium abscessus*.  
535 *PLoS One* **4**:e5660. doi:10.1371/journal.pone.0005660
- 536 Rohmer M, Knani M, Simonin P, Sutter B, Sahm H. 1993. Isoprenoid biosynthesis in bacteria:  
537 a novel pathway for the early steps leading to isopentenyl diphosphate. *Biochem J* **295** (  
538 **Pt 2**:517–24.



- 539 Rossier O, Cianciotto NP. 2005. The *Legionella pneumophila* *tatB* gene facilitates secretion of  
540 phospholipase C, growth under iron-limiting conditions, and intracellular infection.  
541 *Infect Immun* **73**:2020–32. doi:10.1128/IAI.73.4.2020-2032.2005
- 542 Roux A-L, Viljoen A, Bah A, Simeone R, Bernut A, Laencina L, Deramaudt T, Rottman M,  
543 Gaillard J-LJ-L, Majlessi L, Brosch R, Girard-Misguich F, Vergne I, de Chastellier C, Kremer  
544 L, Herrmann J-LJ-L. 2016. The distinct fate of smooth and rough *Mycobacterium*  
545 abscessus variants inside macrophages. *Open Biol* **6**:160185. doi:10.1098/rsob.160185
- 546 Salah IB, Ghigo E, Drancourt M. 2009. Free-living amoebae, a training field for macrophage  
547 resistance of mycobacteria. *Clin Microbiol Infect* **15**:894–905. doi:10.1111/j.1469-  
548 0691.2009.03011.x
- 549 Sasseti CM, Boyd DH, Rubin EJ. 2003. Genes required for mycobacterial growth defined by  
550 high density mutagenesis. *Mol Microbiol* **48**:77–84.
- 551 Schnappinger D, Ehrt S, Voskuil MI, Liu Y, Mangan J a, Monahan IM, Dolganov G, Efron B,  
552 Butcher PD, Nathan C, Schoolnik GK. 2003a. Transcriptional Adaptation of  
553 *Mycobacterium tuberculosis* within Macrophages: Insights into the Phagosomal  
554 Environment. *J Exp Med* **198**:693–704. doi:10.1084/jem.20030846
- 555 Schnappinger D, Ehrt S, Voskuil MI, Liu Y, Mangan JA, Monahan IM, Dolganov G, Efron B,  
556 Butcher PD, Nathan C, Schoolnik GK. 2003b. Transcriptional Adaptation of  
557 *Mycobacterium tuberculosis* within Macrophages. *J Exp Med* **198**:693–704.  
558 doi:10.1084/jem.20030846
- 559 Shah P, Swiatlo E. 2008. MicroReview A multifaceted role for polyamines in bacterial  
560 pathogens. doi:10.1111/j.1365-2958.2008.06126.x
- 561 Sherman DR, Mdluli K, Hickey MJ, Barry CE, Stover CK. 1999. *AhpC*, oxidative stress and drug  
562 resistance in *Mycobacterium tuberculosis*. *Biofactors* **10**:211–7.

- 563 Sherman DR, Voskuil M, Schnappinger D, Liao R, Harrell MI, Schoolnik GK. 2001. Regulation  
564 of the Mycobacterium tuberculosis hypoxic response gene encoding alpha -crystallin.  
565 *Proc Natl Acad Sci U S A* **98**:7534–9. doi:10.1073/pnas.121172498
- 566 Shin D-M, Jeon B-Y, Lee H-M, Jin HS, Yuk J-M, Song C-H, Lee S-H, Lee Z-W, Cho S-N, Kim J-M,  
567 Friedman RL, Jo E-K. 2010. Mycobacterium tuberculosis Eis Regulates Autophagy,  
568 Inflammation, and Cell Death through Redox-dependent Signaling. *PLoS Pathog*  
569 **6**:e1001230. doi:10.1371/journal.ppat.1001230
- 570 Siddiqui R, Khan NA. 2012. Acanthamoeba is an evolutionary ancestor of macrophages: a  
571 myth or reality? *Exp Parasitol* **130**:95–7. doi:10.1016/j.exppara.2011.11.005
- 572 Simeone R, Sayes F, Song O, Gröschel MI, Brodin P, Brosch R, Majlessi L. 2015. Cytosolic  
573 access of Mycobacterium tuberculosis: critical impact of phagosomal acidification  
574 control and demonstration of occurrence in vivo. *PLoS Pathog* **11**:e1004650.  
575 doi:10.1371/journal.ppat.1004650
- 576 Sousa S, Bandeira M, Carvalho PA, Duarte A, Jordao L. 2015. Nontuberculous mycobacteria  
577 pathogenesis and biofilm assembly. *Int J Mycobacteriology* **4**:36–43.  
578 doi:10.1016/J.IJMYCO.2014.11.065
- 579 Stinear TP, Seemann T, Harrison PF, Jenkin GA, Davies JK, Johnson PDR, Abdellah Z,  
580 Arrowsmith C, Chillingworth T, Churcher C, Clarke K, Cronin A, Davis P, Goodhead I,  
581 Holroyd N, Jagels K, Lord A, Moule S, Mungall K, Norbertczak H, Quail MA,  
582 Rabinowitsch E, Walker D, White B, Whitehead S, Small PLC, Brosch R, Ramakrishnan  
583 L, Fischbach MA, Parkhill J, Cole ST. 2008. Insights from the complete genome sequence  
584 of Mycobacterium marinum on the evolution of Mycobacterium tuberculosis. *Genome*  
585 *Res* **18**:729–741. doi:10.1101/gr.075069.107

- 586 Tatusov RL, Galperin MY, Natale DA, Koonin E V. 2000. The COG database: a tool for  
587 genome-scale analysis of protein functions and evolution. *Nucleic Acids Res* **28**:33–6.
- 588 Thomas V, Herrera-rimann K, Blanc DS, Greub G. 2006. Biodiversity of Amoebae and  
589 Amoeba-Resisting Bacteria in a Hospital Water Network. *Appl Env Microbiol* **72**:2428–  
590 2438. doi:10.1128/AEM.72.4.2428
- 591 Thomas V, McDonnell G. 2007. Relationship between mycobacteria and amoebae: ecological  
592 and epidemiological concerns. *Lett Appl Microbiol* **45**:349–57. doi:10.1111/j.1472-  
593 765X.2007.02206.x
- 594 Thomson RM, Carter R, Tolson C, Coulter C, Huygens F, Hargreaves M. 2013. Factors  
595 associated with the isolation of Nontuberculous mycobacteria (NTM) from a large  
596 municipal water system in Brisbane, Australia. *BMC Microbiol* **13**:89. doi:10.1186/1471-  
597 2180-13-89
- 598 Vallenet D, Engelen S, Mornico D, Cruveiller S, Fleury L, Lajus A, Rouy Z, Roche D, Salvignol G,  
599 Scarpelli C, Médigue C. 2009. MicroScope: a platform for microbial genome annotation  
600 and comparative genomics. *Database (Oxford)* **2009**:bap021.  
601 doi:10.1093/database/bap021
- 602 Viljoen A, Dubois V, Girard-Misguich F, Blaise M, Herrmann J-L, Kremer L. 2017. The diverse  
603 family of MmpL transporters in mycobacteria: from regulation to antimicrobial  
604 developments. *Mol Microbiol* **104**. doi:10.1111/mmi.13675
- 605 White CI, Birtles RJ, Wigley P, Jones PH. 2010. Mycobacterium avium subspecies  
606 paratuberculosis in free-living amoebae isolated from fields not used for grazing. *Vet*  
607 *Rec* **166**:401–402. doi:10.1136/vr.b4797
- 608 Wright CC, Hsu FF, Arnett E, Dunaj JL, Davidson PM, Pacheco SA, Harriff MJ, Lewinsohn DM,  
609 Schlesinger LS, Purdy GE. 2017. The Mycobacterium tuberculosis MmpL11 Cell Wall

610 Lipid Transporter Is Important for Biofilm Formation, Intracellular Growth, and  
611 Nonreplicating Persistence. *Infect Immun* **85**:e00131-17. doi:10.1128/IAI.00131-17  
612 Wu S, Barnes PF, Samten B, Pang X, Rodrigue S, Ghanny S, Soteropoulos P, Gaudreau L,  
613 Howard ST. 2009. Activation of the eis gene in a W-Beijing strain of *Mycobacterium*  
614 tuberculosis correlates with increased SigA levels and enhanced intracellular growth.  
615 *Microbiology* **155**:1272–81. doi:10.1099/mic.0.024638-0  
616 Yamaro-Botte Y, Rainczuk AK, Lea-Smith DJ, Brammananth R, van der Peet PL, Meikle P,  
617 Ralton JE, Rupasinghe TWT, Williams SJ, Coppel RL, Crellin PK, McConville MJ. 2015.  
618 Acetylation of Trehalose Mycolates Is Required for Efficient MmpL-Mediated  
619 Membrane Transport in *Corynebacterineae*. *ACS Chem Biol* **10**:734–746.  
620 doi:10.1021/cb5007689  
621  
622

## 623 MATERIALS AND METHODS

### 624 **Bacterial strains, plasmids and growth conditions**

625 A clinical isolate of *M. abscessus* subspecies *massiliense* smooth variant (43S) and *M. chelonae*  
626 type strain CCUG 47445 were used for the RNAseq experiments. Gene deletions were  
627 performed with CIP 104536T type smooth strain of *M. abscessus* subspecies *abscessus*. Both  
628 *M. abscessus* CIP strain and *M. chelonae* type strain were used to perform *in vitro* survival and  
629 complementation tests while gene deletions were performed with *M. abscessus* CIP 104536T  
630 strain. *M. abscessus* and *M. chelonae* strains were routinely grown aerobically at 37 °C and  
631 32°C respectively, in Middlebrook 7H9 medium (Sigma-Aldrich) supplemented with 0.2%  
632 glycerol, 1% glucose, and 250 mg/L kanamycin (Thermo Fisher Scientific) when necessary,  
633 with 25 mg/L zeocin (Thermo Fisher Scientific) for the knockout strains, and with 25 mg/L  
634 zeocin plus 250 mg/L hygromycin (Thermo Fisher Scientific) for complemented strains. *A.*  
635 *castellanii* (ATCC 30010) was grown at room temperature without CO<sub>2</sub> in peptone yeast extract  
636 glucose (PYG) broth for the amplification of the strain. J774.2 cell line was grown and used as  
637 described (Le Moigne et al., 2016; Roux et al., 2016).

638

### 639 **Gene deletion and complementation**

640 Deletion of genes was performed using the recombineering system as described previously  
641 (Medjahed and Singh, 2010; Bakala N’Goma *et al.*, 2015). Growth of the KO strains was  
642 checked by measuring the optical density of bacterial cultures in 7H9 medium supplemented  
643 with glycerol 0.1%. Complementation was performed after amplifying and cloning genes into  
644 the integrative plasmid pMVH361 as described (Bakala N’Goma *et al.*, 2015).

645

### 646 **RNA isolation and RNA sequencing**

647 Approximately  $10^7$  cells were infected in 50 mL tubes, with low agitation, without CO<sub>2</sub>.  
648 Amoebae were infected at 100 MOI at 32°C. M $\phi$  were infected at 50 MOI at 37°C. Cells were  
649 washed 3 times after 1 hour of infection and resuspended in medium supplemented with  
650 amikacin 250  $\mu$ g/mL and incubated for 1 hour to eliminate extracellular bacteria. Three  
651 additional washes were performed and cells were resuspended in medium supplemented with  
652 amikacin 50  $\mu$ g/mL for the rest of the infection. Amoebal cells were harvested 4 h and 16 hpi  
653 for intracellular *M. abscessus* RNA isolation 4h and 16 hpi and 16hpi for intracellular  
654 *M. chelonae* RNA isolation. M $\phi$  were harvested for intracellular *M. abscessus* RNA isolation  
655 16H post-infection. RNA isolation was performed as described (Dubois et al., 2018a). Briefly,  
656 cells were lysed with a cold solution of Guanidium thiocyanate (GTC), N-Lauryl-sarcosine,  
657 Sodium citrate +/- Tween 80 plus  $\beta$ -mercaptoethanol. The lysates containing intracellular  
658 bacteria were collected, centrifuged and RNA was isolated from the bacterial pellets with  
659 TRIzol. The lysates were then transferred into 2 mL screw tubes containing zirconium beads  
660 and were conserved at -80°C for at least 1 day to allow inactivation of RNAses and cells  
661 dissolution. Bacteria cells were disrupted with a bead beater by performing to round at 6.500  
662 rpm for 25 seconds, followed by one round at 6.500 rpm for 20 seconds. Two hundred  $\mu$ L of  
663 chloroforme isoamyl was added and tubes were immediately mixed for 10 seconds. The mixture  
664 was centrifugated at 13.000 rpm for 15 minutes at 4°C. The RNA present in the upper phase  
665 was transferred to a fresh tube and precipitated by adding 0.8 volume of isopropanol. Tubes  
666 were inverted twice to allow precipitation and kept at -20°C for at least 2 hours. The precipitated  
667 RNA was then pelleted by centrifugation at 13.000 rpm for 30 min. at 4°C. The pellet was  
668 washed with ethanol (70%) and centrifuged at 13.000 rpm for 10 min at 4°C. The washed pellet  
669 was air-dried, re-suspended in RNase-free water and stored at -80°C until cDNA library  
670 construction.

671 Control RNA was isolated from bacteria cells grown in amoeba or M $\phi$  co-culture medium  
672 (mowat and DMEM supplemented with 10% Fetal Bovine Serum respectively).  
673 Biological replicates were prepared to allow statistical comparisons of infected and non-  
674 infected samples.

675

### 676 **RNA treatments prior to library preparation and library preparation**

677 RNA samples were treated with DNases (AMBION) to remove DNA contaminants, purified  
678 with the RNA MEGAclean kit (ThermoFisher), and depleted of ribosomal RNA with the  
679 riboZero kit (Illumina). RNA (total, depleted, purified) is checked on the Bioanalyser system  
680 (Agilent) for its quality and integrity. cDNA libraries were prepared with samples displaying a  
681 RIN above 7. RNA concentrations were measured using the nanodrop spectrophotometer  
682 (Thermo Scientific) and the Qubit fluorometer (Invitrogen). Libraries were prepared with the  
683 TruSeq Stranded RNA LT prep kit cDNA synthesis, set A (Illumina) which consists in: (1)  
684 RNA fragmentation, (2) 1st strand cDNA synthesis (Reverse transcriptase and random  
685 primers), (3) 2d strand cDNA synthesis (removal of the RNA template and synthesis of a new  
686 strand with dUTP), (4) no end repair step, (5) adenylation of 3' ends, (6) ligation of adapters  
687 and (7) enrichment of DNA fragments. Libraries are checked for concentration and quality on  
688 DNA chips with the Bioanalyzer Agilent. More precise and accurate quantification is performed  
689 with sensitive fluorescent-based quantitation assays ("Quant-It" assays kit and Qubit  
690 fluorometer, Invitrogen).

691

### 692 **NGS sequencing and data analysis**

693 Sequencing and statistical analysis were performed in the Transcriptome and Epigenome  
694 platform (PF2) of Pasteur Institut, Paris, France. The cDNA libraries were sequenced on  
695 Illumina HiSeq 2500 system by performing an SRM run (SR: Single Read, PE: Paired-end

696 Reads, M: multiplexed samples) of 51 cycles with 7 index bases read. The quality of the  
697 sequencing was assessed with the external FastQC program  
698 (<https://www.bioinformatics.babraham.ac.uk/projects/fastqc/>). After the trimming of adapter  
699 sequences and low-quality reads with cutadapt version 1.11, reads were aligned with RefSeq  
700 assemblies, either *M. abscessus* subsp. *massiliense* strain GO06 assembly (GCF\_000277775.2)  
701 or *M. chelonae* CCUG 47445 assembly (GCF\_001632805.1), using the Bowtie software version  
702 0.12.7 (<http://bowtie-bio.sourceforge.net/index.shtml>) with defaults parameters. Genes were  
703 counted using featureCounts 1.4.6-p3 from Subreads package (parameters: -g gene -t ID -s 1).  
704 Differential analysis of gene expression was performed using the R software (version 3.3.1)  
705 and the Bioconductor packages DESeq2 (version 1.12.3) (Love et al., 2014) using the default  
706 parameters and statistical tests for differential expression were performed applying the  
707 independent filtering algorithm. A generalized linear model was set in order to test for the  
708 differential expression between the biological conditions. For each pairwise comparison, raw  
709 *p*-values were adjusted for multiple testing according to the Benjamini and Hochberg (BH)  
710 procedure (Benjamini and Hochberg, 1995) and genes with an adjusted *p*-value lower than 0.05  
711 were considered differentially expressed. Equivalent to *M. abscessus* subsp. *abscessus* CIP  
712 strain of *M. abscessus* 43S genes and *M. chelonae* genes were determined by Birectionnal Best  
713 Hit search using the OpSCAN software (<http://www.wabi.snv.jussieu.fr/public/opscan/>).  
714 Differentially expressed genes assignment to COGs was performed using the COG automatic  
715 Classification from the MicroScope database (Vallenet et al., 2009). The percentage  
716 assignments were compared by performing Fisher's exact tests. GOE analyses were performed  
717 with the R software topGO package (Bioconductor) (Alexa et al. 2018).

718

719 **Quantitative real-time PCR**



720 qRT-PCR were performed with a CFX96 thermal cycler (Bio-Rad). Controls without reverse  
721 transcriptase were done on each RNA sample to rule out DNA contamination. The sigA gene  
722 was used as an internal control (Bakala N’Goma *et al.*, 2015). Each qRT-PCR was performed  
723 with three biological replicates.

724

### 725 ***In vitro* survival assays**

726 Survival of strains in amoebae and M $\phi$  were performed as previously described (Dubois *et al.*,  
727 2018b). Survival tests of KO strains were performed in duplicates three times. Confirmation of  
728 attenuated phenotypes and complementation tests were performed in triplicates three times.

729

### 730 ***Phagosome acidification and phagosomal escape FRET assays*** *Phagosome acidification*

731 Phagosome acidification and phagosomal escape FRET assays and phagosomal escape FRET  
732 assays were conducted in THP-1 cells as previously described (Roux *et al.*, 2016; Simeone *et*  
733 *al.*, 2015).

734

### 735 ***Cell death, autophagy and ROS production assays***

736 Macrophage death following infection with *M. abscessus* was assessed with the Dead Cell  
737 Apoptosis Kit with Annexin V FITC and PI for flow cytometry (ThermoFischer). Autophagy  
738 was assessed with the Premo™ Autophagy Tandem Sensor RFP-GFP-LC3B Kit  
739 (ThermoFisher). ROS production by macrophages was measured with the MitoSOX Red kit  
740 (ThermoFisher).

741 Infections were performed as previously described (Dubois *et al.*, 2018b), at 50 MOI, except  
742 in the ROS production assay for which the cells were infected 15 min only.

743

### 744 ***Bacterial sensitivity to H<sub>2</sub>O<sub>2</sub>***

745 Sensitivity to H<sub>2</sub>O<sub>2</sub> was assessed by culturing the bacteria in 7H9 medium supplemented with  
746 glycerol 0,1% and H<sub>2</sub>O<sub>2</sub> 3% (Laboratoires Gillbert) (20 μM). CFU tests were performed at  
747 different times post-treatment (2h, 4h, 8h) to determine the number of viable bacteria compared  
748 to the wt strain (Growth Index).

749 ACKNOWLEDGEMENT

750 We thank B. G. Marshall (Southampton University) and S. Gordon (University College,

751 Dublin) for their careful reading of the manuscript and for giving valuable comments.

752 V.D. was supported by French Cystic Fibrosis Patients Association Vaincre la Mucoviscidose

753 Grant RF20150501377.

754 **Figure legends**

755 **Figure 1: Description of *M. abscessus* transcriptomes in Ac (A) and M $\phi$  (C).** Differentially  
756 expressed genes (DEGs) fold change (FC) in *A. castellanii* (Ac) 4 hpi are plotted against DEGs  
757 FC 16 hpi (A). DEGs FC in Ac 16 hpi are also plotted against DEGs FC in macrophages (M $\phi$ )  
758 16 hpi (C). DEGs from quadrant 2 (Q2) and 4 (Q4) are genes regulated in the same direction  
759 whereas DEGs from Q1 and Q3 are genes regulated in opposite direction. Dots on the plot axes  
760 are genes regulated in one condition only. Proportions of DEGs in each case are quantified. *M.*  
761 ***abscessus* adaptations to Ac (B) and M $\phi$  (D) unraveled by COG categorization** Highly  
762 regulated genes were assigned to COGs. The genome assignation (framed in black) serves as a  
763 reference for COG enrichment tests. Fisher's exact tests were performed to compare the  
764 transcriptome sets and the genome set of gene assignments to COG. \*  $p < 0.05$ . \*\*  $p < 0.01$ . \*\*\*  
765  $p < 0.001$ . \*\*\*\*  $p < 0.0001$ .

766

767 **Figure 2: Gene ontology enrichment analyses applied on *M. abscessus* intracellular**  
768 **transcriptomes.**

769 **A.** Up-regulated genes in Ac 16 hpi. **B.** Up-regulated genes in M $\phi$ . **C.** Down-regulated genes  
770 in Ac 16 hpi. **D.** Down-regulated genes in M $\phi$  16 hpi. Gene ontology (GO) enrichment  
771 analysis was performed with the topGO R package. Enriched GOs are sorted according to their  
772 enrichment factor (EF), corresponding to the ratio of significant DEGs assigned to the GO over  
773 expected assigned DEGs to the GO. Enriched GOs are represented by circles which size is  
774 proportional to the amount of significant DEGs assigned. Positive statistical tests are given that  
775 face each GO. Method giving the smallest  $p$ -value is underlined.

776

777 **Figure 3: Intracellular *M. abscessus* relies on fatty acid and cholesterol catabolism.**

778 DEGs FC of genes implicated in Central Carbon Metabolism (CCM) is represented on a Heat  
779 Map ranging from blue (DOWN DEGs) to red (UP DEGs). On this Heat Map both *M. abscessus*  
780 intra-amoebal (Ac) and intra-macrophagic (M $\phi$ ) DEGs are depicted.

781

782 **Figure 4: Regulation of genes required for pathogenic mycobacteria survival *in vitro*.**

783 Regulation of *M. abscessus* genes conserved in *M. tuberculosis*, known to be induced and to  
784 contribute to cellular microbicidal defenses of the tubercle bacillus in M $\phi$  (Mukhopadhyay et  
785 al., 2012) is represented on a Heat Map in a blue (repressed genes) to red (induced genes) color  
786 scale. On this Heat Map both *M. abscessus* intra-amoebal (Ac) and intra-macrophagic (M $\phi$ )  
787 DEGs are depicted and divided in categories: « broad transcription regulators » and genes  
788 implicated in the response to various intracellular stress (« Multiple stress response », « Heat  
789 Shock response », « Molecular chaperones », « DNA damage repair enzymes », « Response to  
790 low O<sub>2</sub> / NO », « Low iron response », « Response to oxidative stress »).

791

792 **Figure 5: Comparative transcriptomic analyses allow identifying genes required for**  
793 ***M. abscessus* survival in amoebae and macrophages.**

794 **A.** Intracellular survival of selected KO ( $\Delta$ OP) in *A. castellani* (Ac) and macrophages (M $\phi$ ). **B.**  
795 Over-expression of 4 *M. abscessus* virulence genes (left panel) in *M. chelonae* and impacts on  
796 *M. chelonae* replication in macrophages (right panel). FC values from *M. chelonae*  
797 transcriptome in Ac 16 hpi are compared to FC value mid-log phase cultures of *M. chelonae*  
798 strains overexpressing *M. abscessus* genes (left panel). Cells were infected at 10 MOI and  
799 colony forming units (CFU) tests were performed 0 and 3 dpi. The relative growth of each strain  
800 as compared to *M. abscessus* wt (Growth Index, GI) is given. All experiments were repeated  
801 twice or more, in duplicates (A.) or triplicates (B). Statistical analyses were performed with  
802 GraphPad PRISM6. Histograms with error bars represent means  $\pm$  SD. Differences between

803 means were analyzed by ANOVA and the Tukey post-test allowing multiple comparisons to be  
804 performed. ns = non-significant. \*  $p < 0.05$ . \*\*  $p < 0.01$ . \*\*\*  $p < 0.001$ . \*\*\*\*  $p < 0.0001$ .

805

806 **Figure 6: *M. abscessus eis2* gene is essential for survival in macrophages and shares**  
807 **functions with *M. tuberculosis eis* conversely to *M. abscessus eis1*.**

808 **A.** Intracellular survival of *M. abscessus eis2* KO strain ( $\Delta eis2_{MAB}$ ) and complementation in  
809 macrophages (M $\phi$ ). **B.** Intracellular survival of *M. abscessus eis1* KO strain ( $\Delta eis1_{MAB}$ ) and  
810 complementation in M $\phi$ . Macrophages were infected at 10 MOI and colony forming unit (CFU)  
811 tests were performed at several times post-infection (0, 1, 3 and 5 dpi). **C.** Control of ROS  
812 production by *M. abscessus* Eis2. ROS production by M $\phi$  was assessed by flow cytometry with  
813 the Mitosox Red kit, 15 min post-infection at 50 MOI. **D.** Sensitivity of *M. abscessus eis2* KO  
814 strain to hydrogen peroxide (H<sub>2</sub>O<sub>2</sub>). Sensitivity to H<sub>2</sub>O<sub>2</sub> was assessed by incubated bacterial  
815 cultures with H<sub>2</sub>O<sub>2</sub> 20  $\mu$ M during 8 h. The amount of survival cells was determined by  
816 performing CFU tests at several hours post-infection (2, 4, 8 hpi). **E.** Control of phagosomal  
817 rupture by *M. abscessus* Eis2. Phagosomal rupture was assessed by performing a Fluorescence  
818 energy transfer (FRET) analysis as previously described (Simeone *et al.*, 2015). Results are  
819 depicted as signal overlays per group with 1,000,000 events per condition acquired in not  
820 infected cells (NI cells), Heat killed *M. abscessus* (HK), wild-type *M. abscessus* (Mabs wt), KO  
821 strains ( $\Delta eis2_{MAB}$ ), KO strains complemented with  $eis2_{MAB}$  (C. $eis2_{MAB}$ ). All experiments were  
822 repeated twice or more in triplicates. Statistical analyses were performed with GraphPad  
823 PRISM6. Histograms with error bars represent means  $\pm$  SD. Differences between means were  
824 analyzed by ANOVA and the Tukey post-test allowing multiple comparisons to be performed.  
825 ns = non-significant. \*  $p < 0.05$ . \*\*  $p < 0.01$ . \*\*\*  $p < 0.001$ . \*\*\*\*  $p < 0.0001$ .

826

**Figure 1**

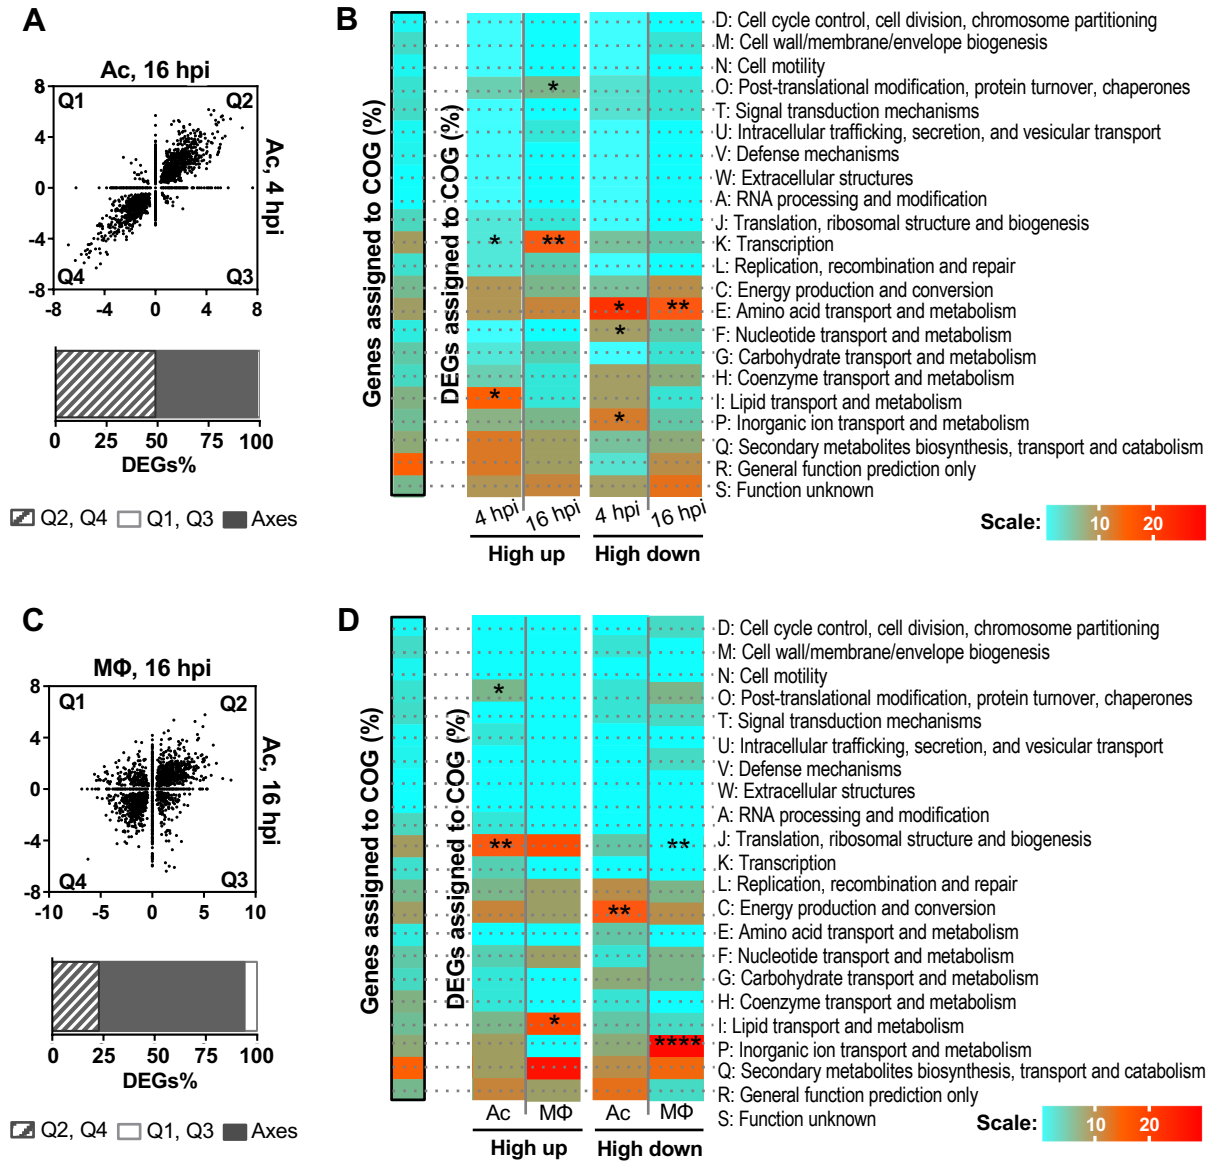

**Figure 2**

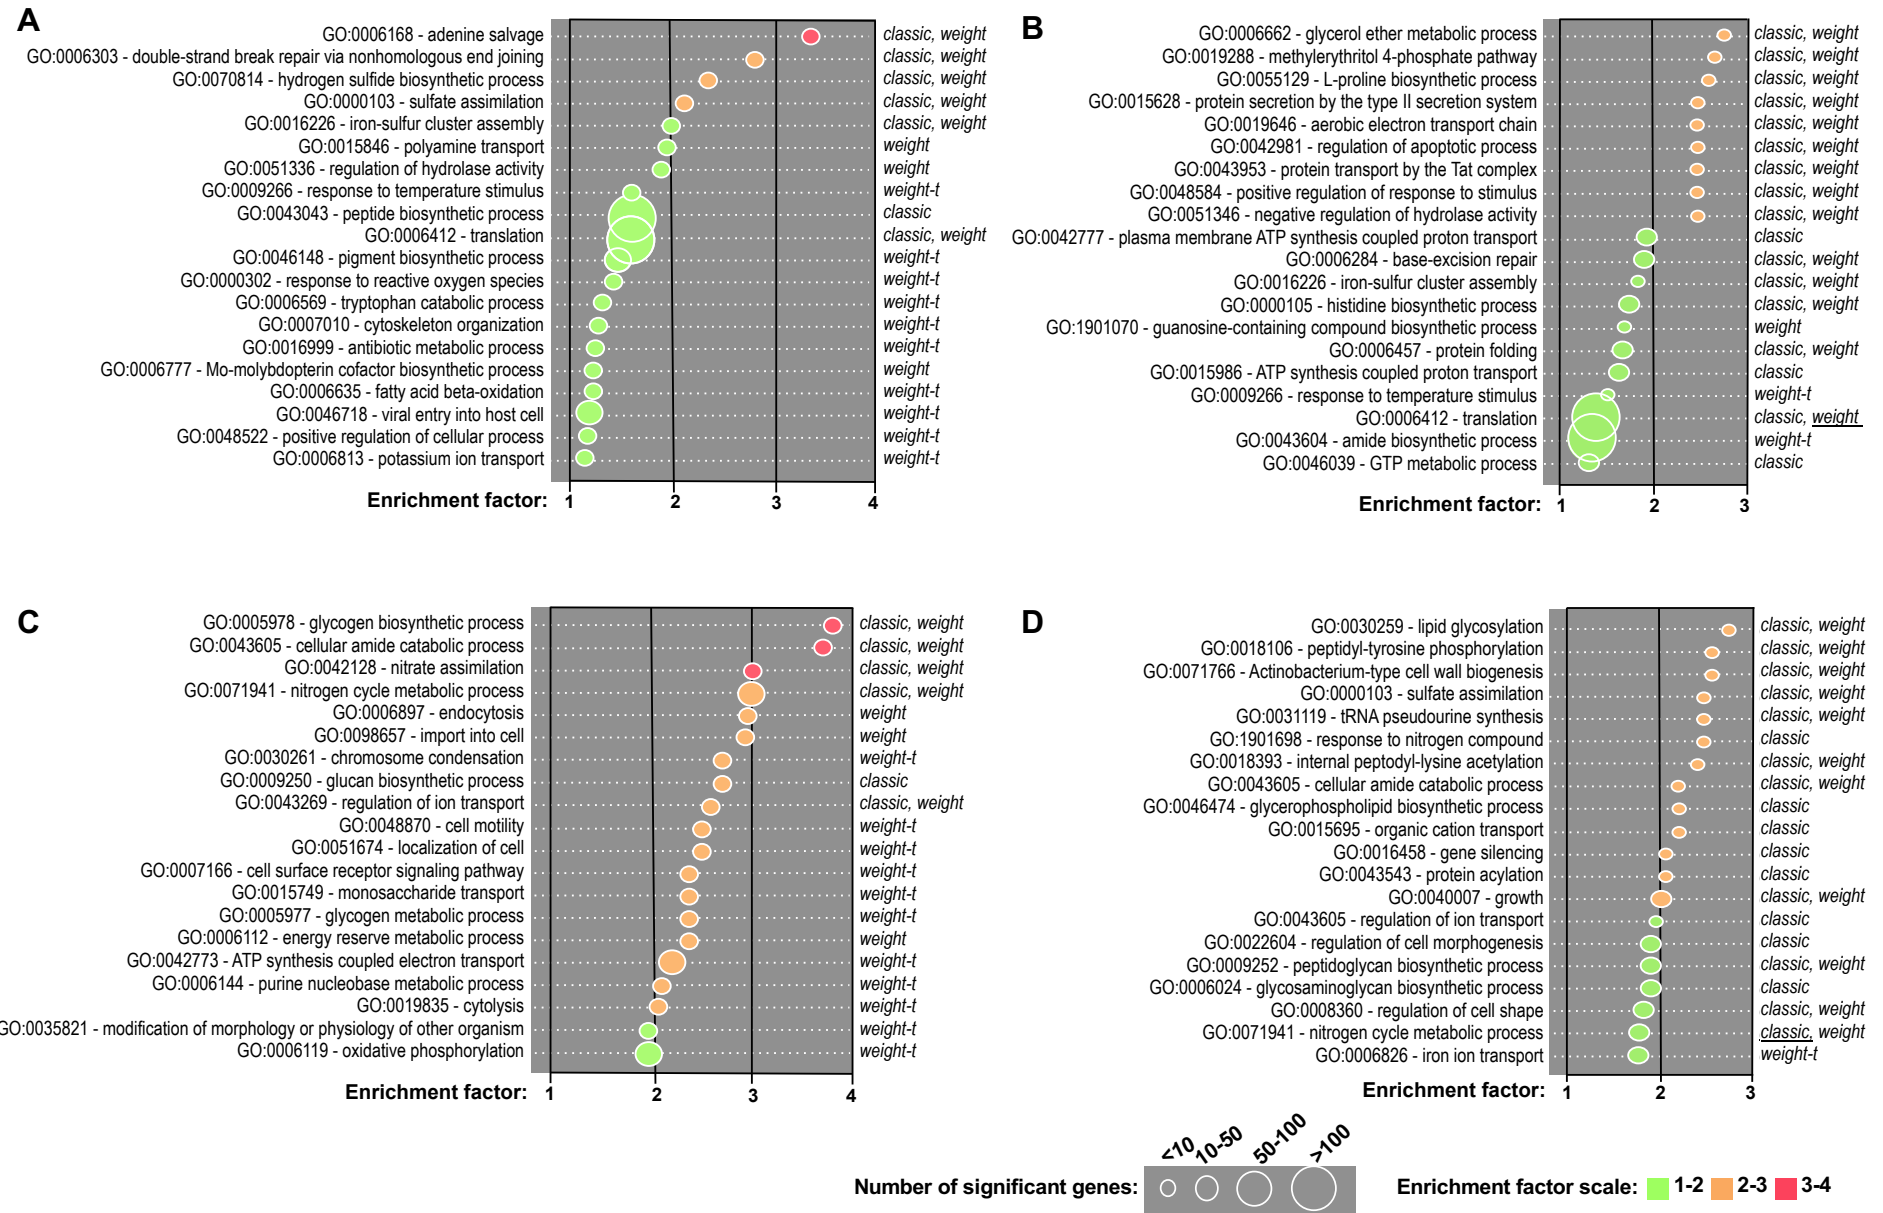



**Figure 3**

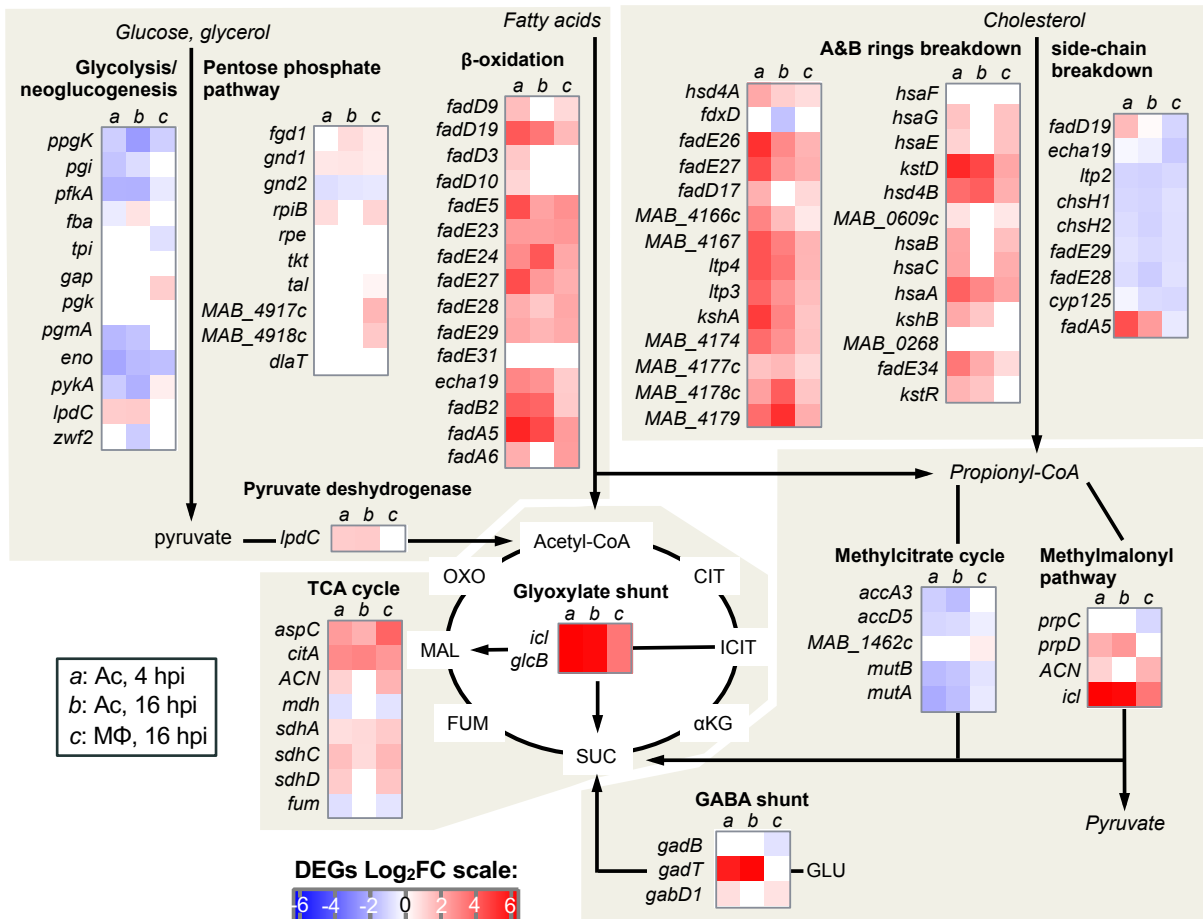

**Figure 4**

**Low O<sub>2</sub>/NO response**

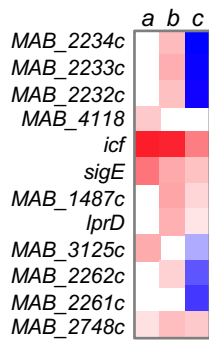

**Low iron response**

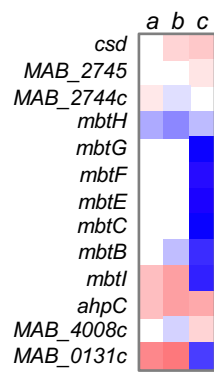

**Transcription regulators**

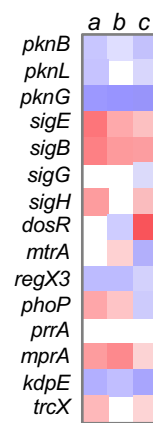

**Molecular chaperones**

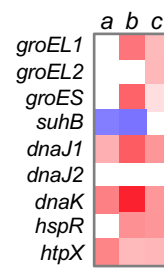

**Multiple stress response**

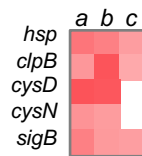

**Heat shock response**

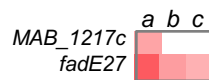

**Response to oxidative stress**

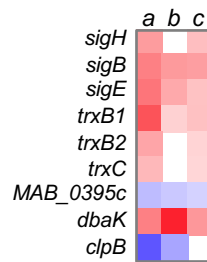

**DNA damage repair enzymes**

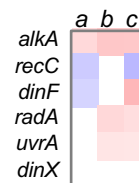

a: Ac, 4 hpi  
b: Ac, 16 hpi  
c: MΦ, 16 hpi

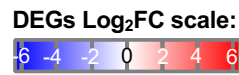

Figure 5

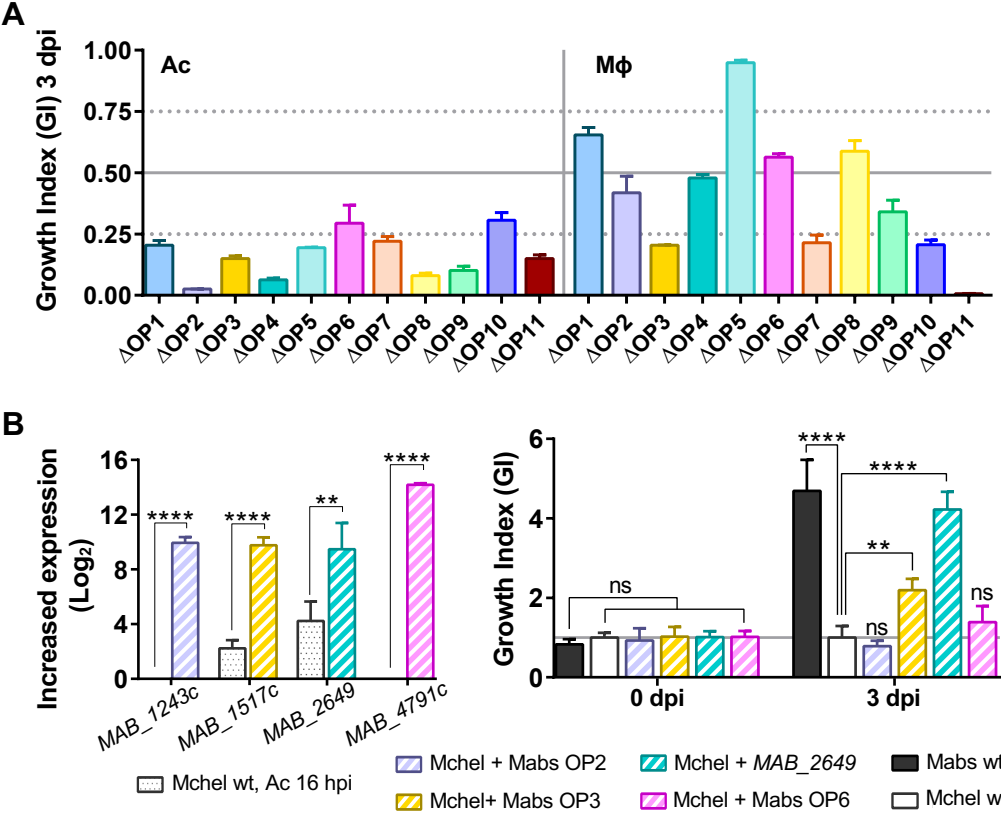

**Figure 6**

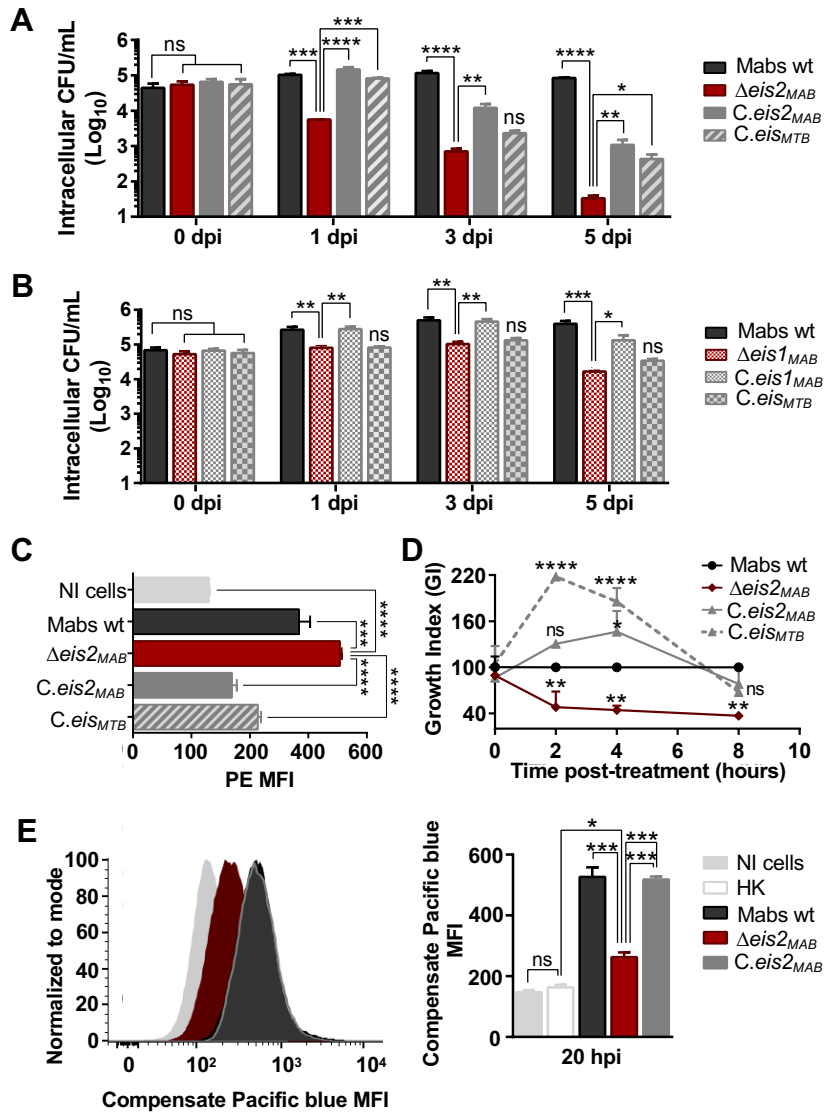

882 **Table 1: Regulation of *M. abscessus* mycolate synthesis operon in Ac and M $\phi$ .**

| <b>Mma gene</b>      | <b>Encoded protein</b>         | <b>Mabs gene</b> | <b>FC Ac<br/>4 hpi</b> | <b>FC Ac<br/>16 hpi</b> | <b>FC M<math>\phi</math><br/>16 hpi</b> |
|----------------------|--------------------------------|------------------|------------------------|-------------------------|-----------------------------------------|
| <i>MYCMA_RS13950</i> | Acyl carrier protein           | <i>MAB_2027</i>  | -3.28                  | -2.91                   | 0.00                                    |
| <i>MYCMA_RS13945</i> | 3-oxoacyl-ACP synthase (Kas B) | <i>MAB_2028</i>  | -2.68                  | -2.24                   | 0.00                                    |
| <i>MYCMA_RS13940</i> | Beta-ketoacyl synthase         | <i>MAB_2029</i>  | -2.95                  | -4.48                   | 0.00                                    |
| <i>MYCMA_RS13935</i> | 3-oxoacyl-ACP synthase (Kas A) | <i>MAB_2030</i>  | -3.80                  | -3.15                   | 0.00                                    |
| <i>MYCMA_RS13930</i> | Beta-ketoacyl synthase         | <i>MAB_2031</i>  | -2.92                  | 0                       | -1.60                                   |
| <i>MYCMA_RS13925</i> | 3-oxoacyl-ACP reductase        | <i>MAB_2032</i>  | -2.16                  | 0                       | -1.85                                   |
| <i>MYCMA_RS13920</i> | Thioesterase                   | <i>MAB_2033</i>  | -2.09                  | 0                       | 0.00                                    |
| <i>MYCMA_RS13915</i> | Malonyl CoA-ACP transacylase   | <i>MAB_2034</i>  | -2.09                  | 0                       | 0.00                                    |
| <i>MYCMA_RS13910</i> | Acyltransferase                | <i>MAB_2035</i>  | 0                      | 0                       | 0.00                                    |
| <i>MYCMA_RS13905</i> | Membrane protein (MmpS)        | <i>MAB_2036</i>  | -1.16                  | 0                       | -1.06                                   |
| <i>MYCMA_RS13900</i> | Hypothetical protein (MmpL)    | <i>MAB_2037</i>  | -0.68                  | -0.86                   | 0.00                                    |
| <i>MYCMA_RS13895</i> | Transporter                    | <i>MAB_2038</i>  | 0                      | 0                       | 0.00                                    |
| <i>MYCMA_RS13890</i> | Lipase (LipH)                  | <i>MAB_2039</i>  | 0                      | 0.86                    | -0.72                                   |

883

884

885 **Table 2: Deleted operons in *M. abscessus* ATCC19977.**

| Operon ID          | Mabs gene        | Protein encoded                           | IP5 motif analysis on hypothetical proteins             |
|--------------------|------------------|-------------------------------------------|---------------------------------------------------------|
| OP1<br>(2231455)   | <i>MAB_4664</i>  | Hypothetical protein                      | No IPR                                                  |
|                    | <i>MAB_1242c</i> | Hypothetical protein                      | No IPR                                                  |
|                    | <i>MAB_1243c</i> | Hypothetical protein                      | IPR035568: ABC transporter.<br>FecCD/TroCD-like         |
| OP2<br>(395711)    | <i>MAB_1244c</i> | Hypothetical protein                      | No IPR                                                  |
|                    | <i>MAB_1245c</i> | Hypothetical protein                      | No IPR                                                  |
|                    | <i>MAB_1246c</i> | Hypothetical protein                      | No IPR                                                  |
|                    | <i>MAB_1247c</i> | Hypothetical protein                      | IPR005531: Alkaline shock protein<br>Asp23              |
| OP3<br>(2230454)   | <i>MAB_1517c</i> | Probable O-methyltransferase<br>Omt       |                                                         |
| OP4<br>(396003)    | <i>MAB_2649</i>  | Putative membrane protein.<br>MmpS family |                                                         |
|                    | <i>MAB_2650</i>  | Putative membrane protein.<br>MmpL family |                                                         |
| OP5<br>(2231454)   | <i>MAB_4663</i>  | Hypothetical protein                      | No IPR                                                  |
| OP6<br>(2231514)   | <i>MAB_4791c</i> | Hypothetical protein                      | Twin-arginine translocation pathway.<br>Signal sequence |
| OP7<br>(2229980)   | <i>MAB_0086</i>  | Taurine catabolism dioxygenase            |                                                         |
| OP8<br>(395598)    | <i>MAB_0734</i>  | Hypothetical protein                      | Leukocidin/porin MspA superfamily<br>(036435)           |
|                    | <i>MAB_3132c</i> | Membrane protein                          | No IPR                                                  |
| OP9<br>(396109)    | <i>MAB_3133c</i> | Hemin transporter                         |                                                         |
|                    | <i>MAB_3134c</i> | Transcriptional regulator                 |                                                         |
| OP10<br>(2231416)  | <i>MAB_4509c</i> | Hypothetical protein                      | No IPR                                                  |
| OP11<br>(22311420) | <i>MAB_4532c</i> | Hypothetical protein                      | N-acetyltransferase Eis (016181)                        |
