# Supplementary material for: Mycobacterium abscessus virulence traits unraveled by transcriptomic profiling in amoeba and macrophages
Source: bioRxiv or medRxiv preprint supplement (doi:10.1101/529057), 2019-01-23
Supplement: Supplementary file [file media-1.pdf]

827 **Supp. Figure legends**

828 **Sup. Figure 1: DESeq2 statistical analyses.**

829 **A.** *M. abscessus* transcriptomes in *A. castellanii* 4 and 16 hpi. **B.** *M. abscessus* transcriptome in  
830 macrophages 16 hpi. **C.** *M. chelonae* transcriptome in *A. castellanii* 16 hpi. Hierarchical  
831 clustering of raw data (left panel) and transcriptome heatmaps (right panel) are depicted.

832

833 **Sup. Figure 2: Comparison of *M. abscessus* transcriptomes in *A. castellanii* and in**  
834 **macrophages according to differentially expressed genes fold change.**

835 **A.** Differentially expressed genes (DEGs) were categorized according to their fold change (FC)  
836 expressed in Log<sub>2</sub>. Low DEGs depict a FC under |2|, Med DEGs depict a FC between |2| and  
837 |4| and High DEGs depict a FC higher than |4|. **B.** Ratio of UP DEGs to DOWN DEGs were  
838 represented during co-cultures with *A. castellanii* (Ac) and macrophages (ϕ).

839

840 **Sup. Figure 3: Selection of *M. abscessus* genes highly induced in amoebae.**

841 *M. abscessus* highly induced genes in *A. castellanii* (Ac) were considered (n=77). Genes poorly  
842 induced in macrophages (Mϕ) (filter 1) and during *M. chelonae* co-culture with amoeba (filter  
843 2) were conserved (n=45). FC: fold change (Log<sub>2</sub> value).

844

845 **Sup. Figure 4: Verification of knockout strains growth in culture medium and**  
846 **contribution to virulence in macrophages.**

847 **A.** KO strains growth in culture medium. The strains were cultured in 7H9 medium  
848 supplemented with glycerol 0.1% for seven days. Growth curves were obtained by measuring  
849 the cultures optical density each day. **B.** Complementation of *M. abscessus* ΔOP<sub>3,-4</sub> and 6  
850 strains in macrophages. Macrophages were infected at 10 MOI. Experiments were repeated  
851 three times in triplicates. Statistical analyses were performed with GraphPad PRISM6.

852 Histograms with error bars represent means  $\pm$  SD. Differences between means were analyzed  
853 by ANOVA and the Tukey post-test allowing multiple comparisons to be performed. ns = non-  
854 significant. \*  $p < 0.05$ . \*\*  $p < 0.01$ . \*\*\*  $p < 0.001$ . \*\*\*\*  $p < 0.0001$ .

855

856 **Sup. Figure 5: Conservation of *M. abscessus eis* loci in *Mycobacterium tuberculosis* and**  
857 **vice versa.**

858 **A.** Conservation of *M. abscessus eis1* locus in *M. tuberculosis*. **B.** Conservation of *M. abscessus*  
859 *eis2* locus in *M. tuberculosis*. **C.** Conservation of *M. tuberculosis eis* locus in *M. abscessus*.

860 Bidirectional Best Hit (BBH) search was performed between *M. abscessus* and *M. tuberculosis*  
861 genomes with the Opscan software. BBHs are depicted by arrows filled with red, brown or  
862 orange. Brown arrows correspond to MmpL-encoding genes. Orange arrows correspond to  
863 MmpS-encoding genes. Greys bands link genes or groups of genes conserved in the two  
864 species.

865

866 **Sup. Figure 6: Expression of *M. abscessus eis* genes in macrophages 4 and 16 hpi.** *Eis1<sub>MAB</sub>*  
867 (left panel) and *eis2<sub>MAB</sub>* (right panel) expression in macrophages was measured twice in  
868 triplicates by quantitative-real time PCR by normalization with *sigA* housekeeping gene.

869

870 **Sup. Figure 7: Intracellular phenotypes uncontrolled by *M. abscessus eis2* genes.**

871 **A.** Cell death. Macrophage death following infection with *M. abscessus* was assessed with the  
872 Dead Cell Apoptosis Kit with Annexin V FITC and PI for flow cytometry. **B.** Cell autophagy  
873 was measured Premo Autophagy Tandem Sensor RFP-GFP-LC3B Kit. At least 40 cells per  
874 condition were analyzed by confocal microscopy. The number of autophagic particules per cell  
875 (left panel) and acidification of autophagosomes (right panel) was determined with the Fiji  
876 software. **C.** Phagosomal acidification was assessed as previously described (Roux *et al.*, 2016).

877 Macrophages were infected at 10 (C) or 50 MOI (A and B). Histograms with error bars  
878 represent means  $\pm$  SD. Differences between means were analyzed by ANOVA and the Tukey  
879 post-test allowing multiple comparisons to be performed. ns = non-significant. \*  $p < 0.05$ . \*\*  
880  $p < 0.01$ . \*\*\*  $p < 0.001$ . \*\*\*\*  $p < 0.0001$ .

881

Supp. Figure 1

**A**

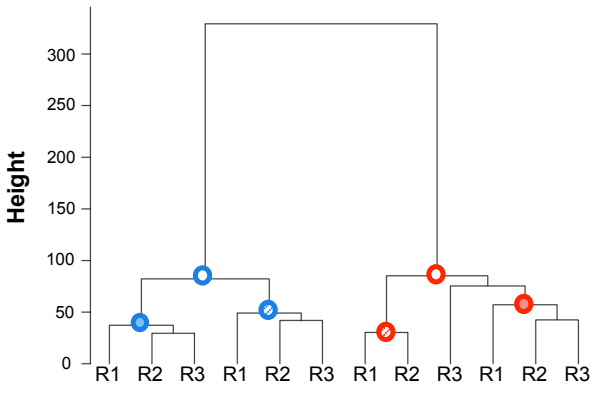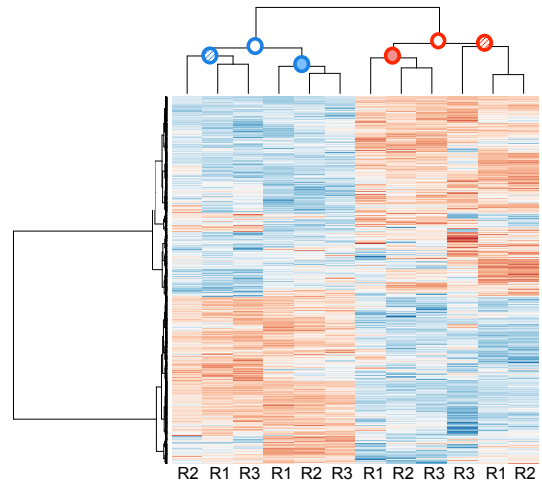

**B**

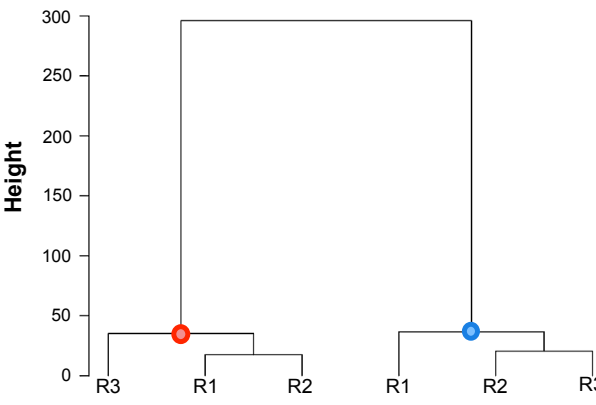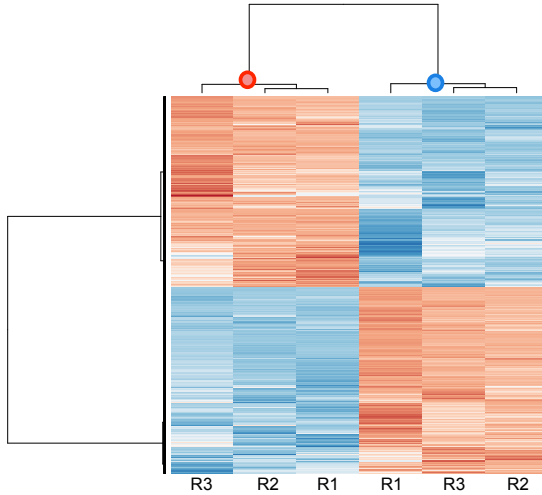

**C**

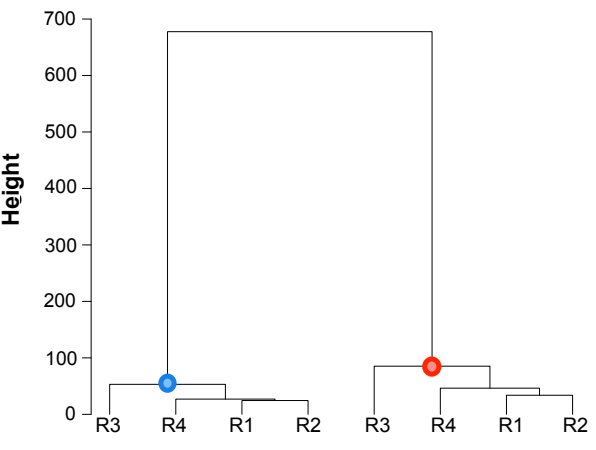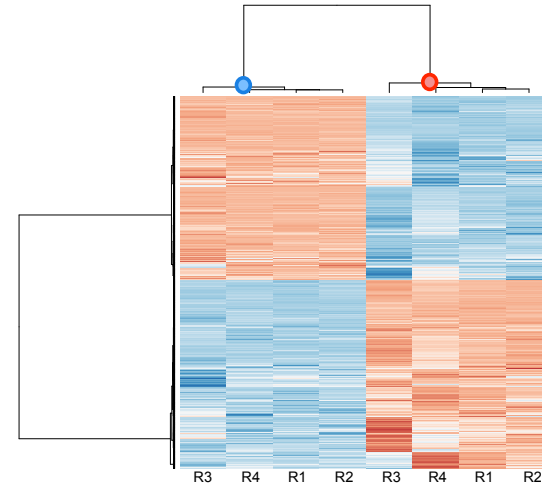

- Intracellular bacteria: ⊗ 4 hpi   ● 16 hpi
- Panctonic bacteria: ⊗ 4 h   ● 16 h

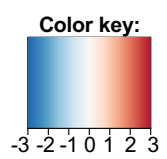

Supp. Figure 2

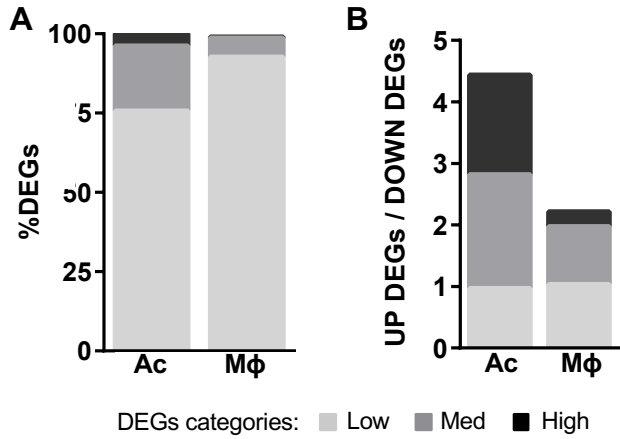

Supp. Figure 3

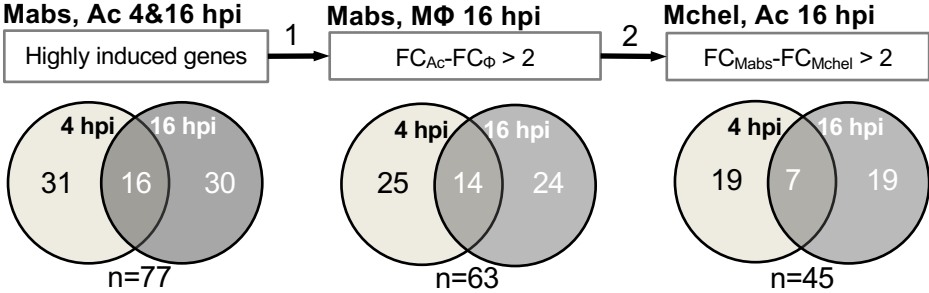

Supp. Figure 4

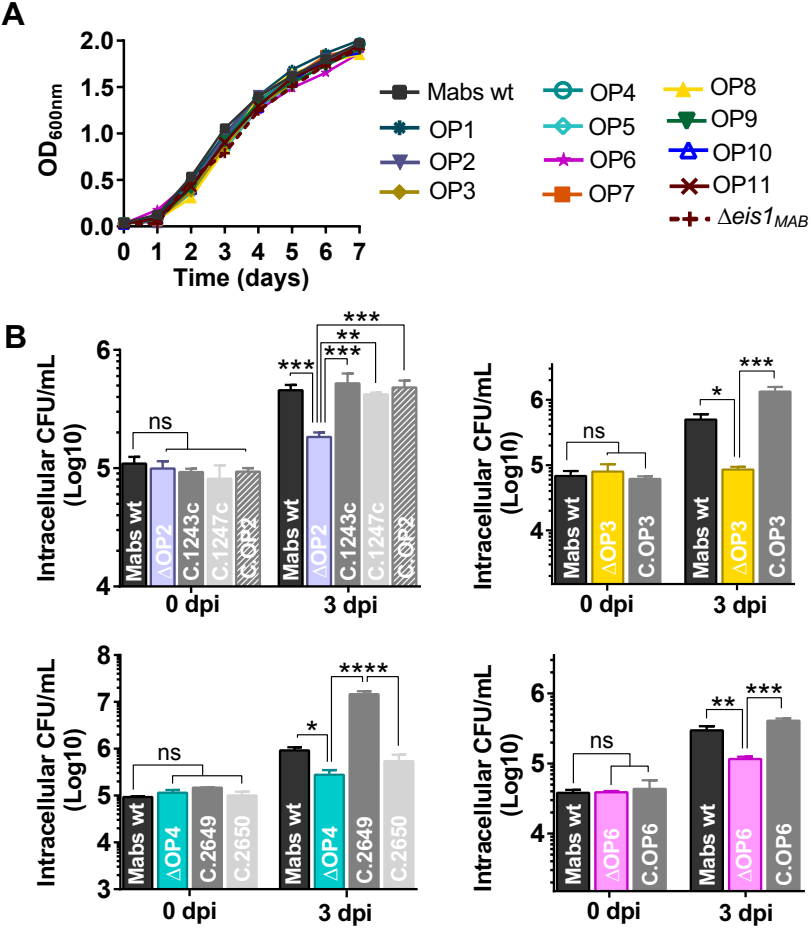

# Sup. Figure 5

**A**

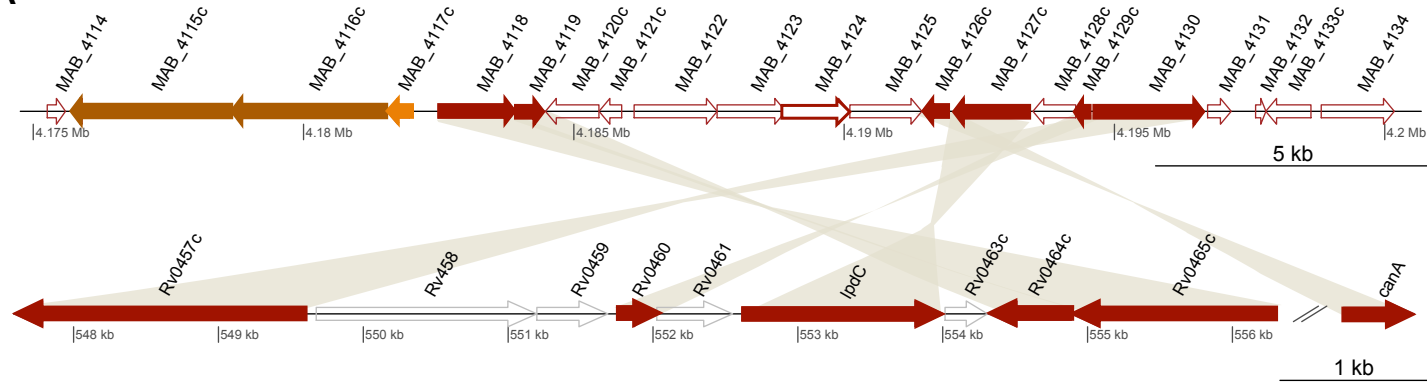

**B**

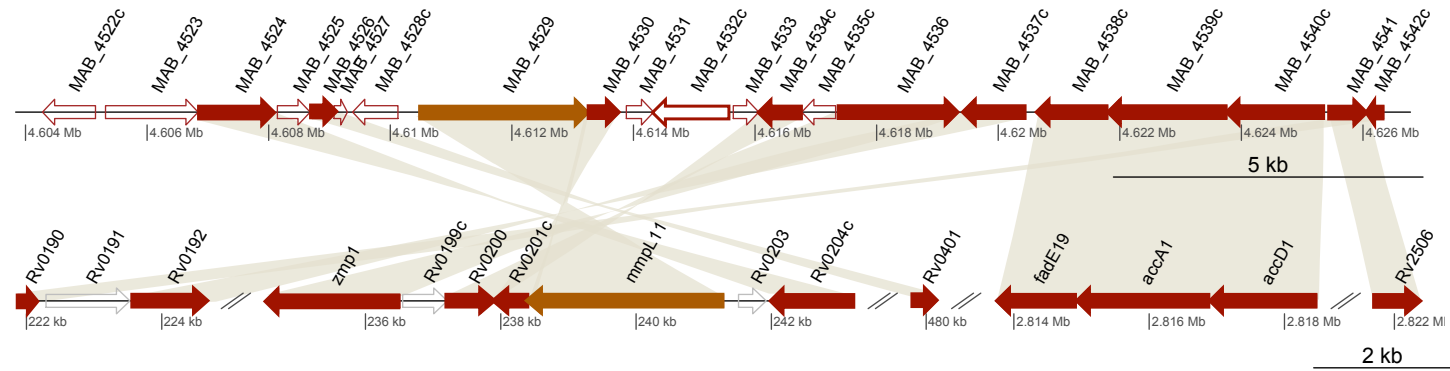

**C**

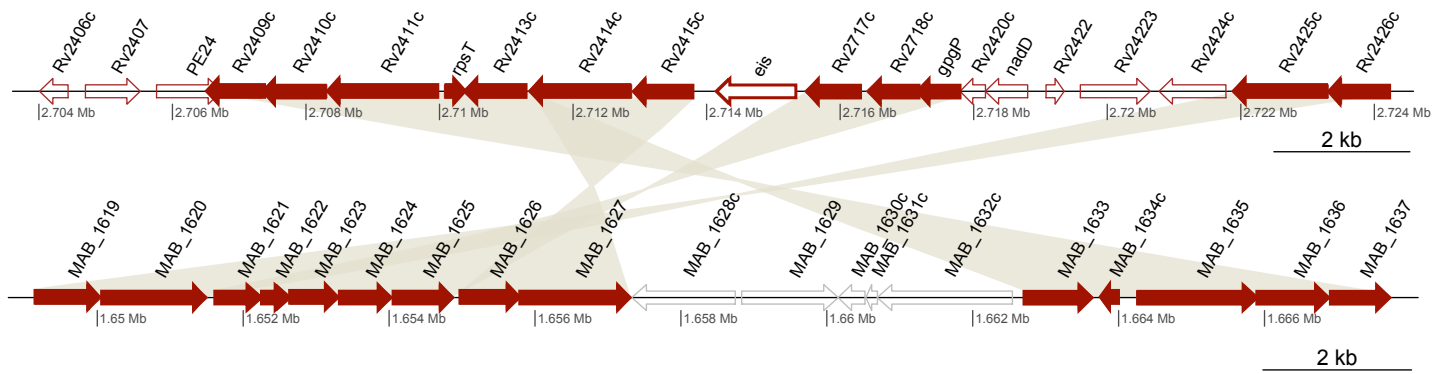



Supp. Figure 6

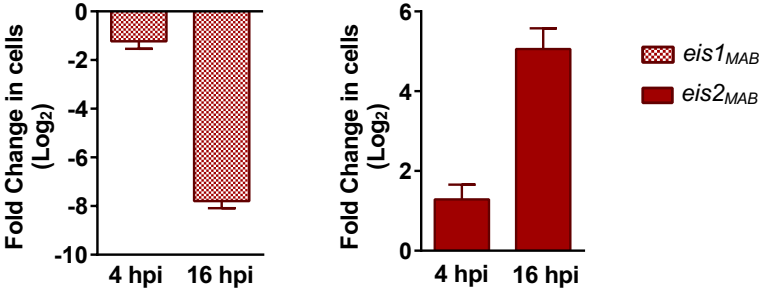

Supp. Figure 7

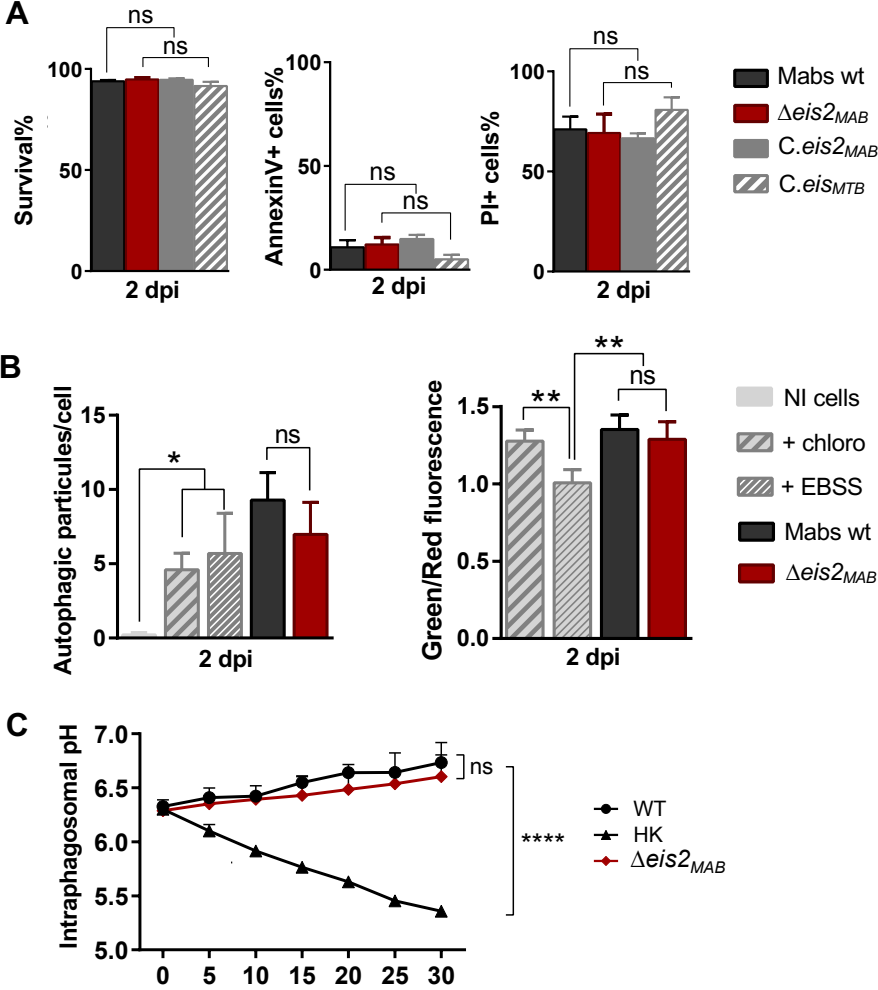

887  
888

**Supp. Table 1: Differentially expressed genes identified with the *DEseq2* package.**

| <b>Transcriptomes</b> | <b>Down DEGs</b> | <b>Up DEGs</b> | <b>Tot</b> | <b>CDS covered</b> |
|-----------------------|------------------|----------------|------------|--------------------|
| Mabs, Ac 4 hpi        | 1218             | 1355           | 2573       | 56%                |
| Mabs, Ac 16 hpi       | 1095             | 1122           | 2217       | 49%                |
| Mabs, M $\phi$ hpi    | 1646             | 1671           | 3317       | 73%                |
| Mchel, Ac 16 hpi      | 1186             | 1949           | 3835       | 80%                |

**Supp. Table 2: List of *M. abscessus* genes highly induced in Ac only.**

| Mma gene                                          | Encoded protein                                                | IP5 analysis (IPR)                        | Mabs BBH         | MTB BBH       | MAV BBH         | FC Ac, 4 hpi | FC Ac, 16 hpi |
|---------------------------------------------------|----------------------------------------------------------------|-------------------------------------------|------------------|---------------|-----------------|--------------|---------------|
| <b><i>Highly induced genes 4 hpi</i></b>          |                                                                |                                           |                  |               |                 |              |               |
| <i>MYCMA_RS01100</i>                              | Hypothetical protein                                           | No IPR                                    | <i>MAB_4664</i>  |               |                 | 5.71         | 0.00          |
| <i>MYCMA_RS08980</i>                              | Glyoxalase                                                     |                                           | <i>MAB_3056c</i> |               |                 | 5.32         | 1.81          |
| <i>MYCMA_RS10865</i>                              | Hypothetical protein                                           | Magnesium transporter MgtE (006669)       | <i>MAB_2717c</i> |               | <i>MAV_2122</i> | 5.26         | 1.44          |
| <i>MYCMA_RS14505</i>                              | MULTISPECIES: 3-methyl-2-oxobutanoate hydroxymethyltransferase |                                           | <i>MAB_1916c</i> | <i>panB</i>   | <i>panB</i>     | 5.22         | 1.89          |
| <i>MYCMA_RS17210</i>                              | Copper oxidase                                                 |                                           | <i>MAB_1271c</i> |               |                 | 4.99         | 2.71          |
| <i>MYCMA_RS10860</i>                              | Hypothetical protein                                           | No IPR                                    | -                |               |                 | 4.99         | 1.26          |
| <i>MYCMA_RS11360</i>                              | Monooxygenase                                                  |                                           | <i>MAB_2607</i>  |               |                 | 4.93         | 0.00          |
| <i>MYCMA_RS10755</i>                              | Hypothetical protein                                           | No IPR                                    | <i>MAB_2738c</i> |               |                 | 4.84         | 2.22          |
| <i>MYCMA_RS17970</i>                              | Hypothetical protein                                           | No IPR                                    | <i>MAB_1117c</i> |               |                 | 4.49         | 2.33          |
| <i>MYCMA_RS07655</i>                              | MULTISPECIES: alkylhydroperoxidase                             |                                           | <i>MAB_3311c</i> |               |                 | 4.48         | 3.25          |
| <i>MYCMA_RS02005</i>                              | Short-chain dehydrogenase                                      |                                           | <i>MAB_4478c</i> |               | <i>MAV_1797</i> | 4.45         | 1.84          |
| <i>MYCMA_RS06830</i>                              | Nitroreductase                                                 |                                           | <i>MAB_3461c</i> |               |                 | 4.38         | 2.11          |
| <i>MYCMA_RS20755</i>                              | Membrane protein                                               | Transport accessory protein MmpS (008693) | <i>MAB_0477</i>  |               |                 | 4.31         | 2.77          |
| <i>MYCMA_RS09135</i>                              | Hypothetical protein                                           | Virulence factor BrkB (017039)            | <i>MAB_3025</i>  | <i>Rv2707</i> | <i>MAV_3600</i> | 4.29         | 1.90          |
| <i>MYCMA_RS11655</i>                              | Hypothetical protein                                           | No IPR                                    | -                |               |                 | 4.23         | 1.87          |
| <i>MYCMA_RS08985</i>                              | Pyridoxamine 5'-phosphate oxidase                              |                                           | <i>MAB_3055c</i> |               |                 | 4.16         | 0.00          |
| <i>MYCMA_RS11985</i>                              | Sulfite reductase subunit alpha                                |                                           | <i>MAB_2492</i>  |               |                 | 4.13         | 2.55          |
| <i>MYCMA_RS12840</i>                              | Hypothetical protein                                           | No IPR                                    | <i>MAB_2313</i>  |               |                 | 4.07         | 3.46          |
| <i>MYCMA_RS03450</i>                              | Acyl-CoA dehydrogenase                                         |                                           | <i>MAB_4158</i>  | <i>fadE26</i> | <i>MAV_0652</i> | 4.05         | 2.31          |
| <b><i>Highly induced genes 4 &amp; 16 hpi</i></b> |                                                                |                                           |                  |               |                 |              |               |
| <i>MYCMA_RS18820</i>                              | Sugar translocase                                              |                                           | -                |               |                 | 6.52         | 6.22          |
| <i>MYCMA_RS11145</i>                              | MULTISPECIES: MmpS family protein                              |                                           | <i>MAB_2649</i>  |               |                 | 4.73         | 6.82          |

|                                    |                                       |                                                               |                  |               |                 |      |      |
|------------------------------------|---------------------------------------|---------------------------------------------------------------|------------------|---------------|-----------------|------|------|
| <i>MYCMA_RS19885</i>               | Short-chain dehydrogenase             |                                                               | <i>MAB_0646c</i> | <i>Rv0068</i> | <i>MAV_4710</i> | 5.67 | 5.27 |
| <i>MYCMA_RS01105</i>               | Hypothetical protein                  | No IPR                                                        | <i>MAB_4663</i>  |               |                 | 6.16 | 4.18 |
| <i>MYCMA_RS00455</i>               | Hypothetical protein                  | Twin-arginine translocation pathway, signal sequence (006311) | <i>MAB_4791c</i> |               |                 | 5.17 | 4.96 |
| <i>MYCMA_RS21900</i>               | TQXA domain-containing protein        |                                                               | <i>MAB_0219</i>  |               | <i>MAV_2053</i> | 5.33 | 4.73 |
| <i>MYCMA_RS07540</i>               | MULTISPECIES: ATP-binding protein     |                                                               | <i>MAB_3325c</i> |               |                 | 5.03 | 4.75 |
| <b>Highly induced genes 16 hpi</b> |                                       |                                                               |                  |               |                 |      |      |
| <i>MYCMA_RS13965</i>               | (Fe-S)-cluster assembly protein       |                                                               | <i>MAB_2020c</i> |               |                 | 2.77 | 4.93 |
| <i>MYCMA_RS17325</i>               | Hypothetical protein                  | No IPR                                                        | <i>MAB_1244c</i> |               |                 | 3.11 | 5.03 |
| <i>MYCMA_RS06800</i>               | MerR family transcriptional regulator |                                                               | -                |               |                 | 2.71 | 4.00 |
| <i>MYCMA_RS15995</i>               | TetR family transcriptional regulator |                                                               | <i>MAB_1518</i>  |               | <i>MAV_4046</i> | 1.52 | 4.01 |
| <i>MYCMA_RS18825</i>               | MarR family transcriptional regulator |                                                               | <i>MAB_0925c</i> |               |                 | 3.20 | 5.04 |
| <i>MYCMA_RS17330</i>               | Hypothetical protein                  | ABC transporter, FecCD/TroCD-like                             | <i>MAB_1243c</i> |               |                 | 2.86 | 4.97 |
| <i>MYCMA_RS17315</i>               | Hypothetical protein                  | Alkaline shock protein Asp23 (05531)                          | <i>MAB_1247c</i> |               |                 | 3.43 | 5.10 |
| <i>MYCMA_RS02820</i>               | MULTISPECIES: molecular chaperone     |                                                               | <i>MAB_4273c</i> | <i>dnaK</i>   | <i>dnaK</i>     | 2.63 | 4.87 |
| <i>MYCMA_RS12505</i>               | Activator of HSP90 ATPase             |                                                               | <i>MAB_2387</i>  |               |                 | 3.12 | 4.99 |
| <i>MYCMA_RS20640</i>               | Carboxymuconolactone decarboxylase    |                                                               | -                |               |                 | 0.00 | 7.63 |
| <i>MYCMA_RS10645</i>               | YrbE family protein                   |                                                               | -                |               |                 | 0.00 | 4.71 |
| <i>MYCMA_RS16000</i>               | GlcNAc transferase                    |                                                               | <i>MAB_1517c</i> |               | <i>MAV_4048</i> | 0.00 | 4.31 |
| <i>MYCMA_RS17320</i>               | Hypothetical protein                  | No IPR                                                        | <i>MAB_1246c</i> |               |                 | 2.07 | 4.27 |
| <i>MYCMA_RS09170</i>               | GntR family transcriptional regulator |                                                               | <i>MAB_3018</i>  | <i>Rv0586</i> | <i>MAV_4554</i> | 0.00 | 5.71 |
| <i>MYCMA_RS10650</i>               | Membrane protein                      | No IPR                                                        | -                |               |                 | 0.00 | 4.17 |
| <i>MYCMA_RS01300</i>               | TetR family transcriptional regulator |                                                               | <i>MAB_4625</i>  |               |                 | 2.55 | 4.30 |
| <i>MYCMA_RS10655</i>               | Membrane protein                      | No IPR                                                        | -                |               |                 | 0.00 | 4.05 |
| <i>MYCMA_RS02345</i>               | MULTISPECIES: alkyl hydroperoxide     |                                                               | <i>MAB_4408c</i> | <i>ahpC</i>   | <i>MAV_2839</i> | 3.46 | 4.04 |
| <i>MYCMA_RS14940</i>               | Transposase                           |                                                               | -                |               |                 | 3.22 | 4.03 |

**Supp. Table 3 : List of *M. abscessus* genes highly induced in M $\phi$  or Ac 16 hpi.**

| <b>Mma gene</b>      | <b>Encoded protein</b>                  | <b>IP5 analysis (IPR)</b>                        | <b>Mabs gene</b> | <b>MTB BBH</b> | <b>MAV BBH</b>  | <b>FC M<math>\phi</math></b> | <b>FC Ac</b> |
|----------------------|-----------------------------------------|--------------------------------------------------|------------------|----------------|-----------------|------------------------------|--------------|
| <i>MYCMA_RS01880</i> | Hypothetical protein                    | No IPR                                           | <i>MAB_4509c</i> | -              | -               | 5.78                         | 5.11         |
| <i>MYCMA_RS01765</i> | Hypothetical protein                    | N-acetyltransferase Eis (016181)                 | <i>MAB_4532c</i> | -              | -               | 5.37                         | 2.09         |
| <i>MYCMA_RS13035</i> | MFS transporter                         |                                                  | <i>MAB_2273</i>  | -              | -               | 5.26                         | 4.15         |
| <i>MYCMA_RS17085</i> | Acyltransferase                         |                                                  | <i>MAB_1297c</i> | -              | <i>MAV_4113</i> | 4.86                         | 4.91         |
| <i>MYCMA_RS08590</i> | Transcriptional regulator               |                                                  | <i>MAB_3134c</i> | -              | -               | 4.54                         | 1.55         |
| <i>MYCMA_RS08595</i> | Hemin transporter                       |                                                  | <i>MAB_3133c</i> | -              | -               | 4.36                         | 1.14         |
| <i>MYCMA_RS06600</i> | MULTISPECIES: transcriptional regulator |                                                  | <i>MAB_3508c</i> | <i>whiB7</i>   | <i>MAV_4142</i> | 4,24                         | 4,37         |
| <i>MYCMA_RS02565</i> | Acetyltransferase                       |                                                  | <i>MAB_4324c</i> | -              | -               | 4.18                         | 0.00         |
| <i>MYCMA_RS05440</i> | Membrane protein                        | EamA domain (000620)                             | <i>MAB_3762</i>  | -              | -               | 3.96                         | 4.49         |
| <i>MYCMA_RS12630</i> | ABC transporter                         |                                                  | <i>MAB_2355c</i> | -              | -               | 3.92                         | 1.76         |
| <i>MYCMA_RS17930</i> | GNAT family acetyltransferase           |                                                  | <i>MAB_1125c</i> | -              | -               | 3.89                         | 1.62         |
| <i>MYCMA_RS05315</i> | Hypothetical protein                    | No IPR                                           | <i>MAB_3786c</i> | -              | -               | 3.85                         | 0.90         |
| <i>MYCMA_RS08600</i> | Membrane protein                        | No IPR                                           | <i>MAB_3132c</i> | <i>Rv2620c</i> | <i>MAV_3498</i> | 3.83                         | 0.00         |
| <i>MYCMA_RS19730</i> | Membrane protein                        | EamA domain (000620)                             | <i>MAB_0677c</i> | -              | -               | 3.83                         | 0.00         |
| <i>MYCMA_RS22615</i> | Esterase                                |                                                  | <i>MAB_0078</i>  | -              | <i>MAV_3025</i> | 3.82                         | 2.92         |
| <i>MYCMA_RS13590</i> | DEAD/DEAH box helicase                  |                                                  | <i>MAB_2158c</i> | -              | <i>MAV_2956</i> | 3.81                         | 4.38         |
| <i>MYCMA_RS11580</i> | Universal stress protein UspA           |                                                  | -                | -              | -               | 3.78                         | 0.00         |
| <i>MYCMA_RS06595</i> | Hypothetical protein                    | No IPR                                           | <i>MAB_3509c</i> | -              | -               | 3.72                         | 3.35         |
| <i>MYCMA_RS22620</i> | IclR family transcriptional regulator   |                                                  | <i>MAB_0077</i>  | -              | <i>MAV_3024</i> | 3.69                         | 2.54         |
| <i>MYCMA_RS08355</i> | Membrane protein                        | EamA domain (000620)                             | <i>MAB_3180</i>  | -              | <i>MAV_0095</i> | 3.68                         | -1.60        |
| <i>MYCMA_RS04790</i> | DNA-binding response regulator          |                                                  | <i>MAB_3891c</i> | <i>devR</i>    | <i>MAV_4109</i> | 3.62                         | -1.02        |
| <i>MYCMA_RS19020</i> | Hypothetical protein                    | FAD//NAD(P)-binding domain superfamily (1036188) | <i>MAB_0857</i>  | -              | -               | 3.55                         | 2.73         |
| <i>MYCMA_RS10510</i> | Transporter                             |                                                  | <i>MAB_2780c</i> | -              | -               | 3.47                         | 0.83         |
| <i>MYCMA_RS13570</i> | Hypothetical protein                    | No IPR                                           | -                | -              | -               | 3.45                         | 0.00         |
| <i>MYCMA_RS16570</i> | MFS transporter                         |                                                  | <i>MAB_1409c</i> | <i>Rv1258c</i> | <i>MAV_1406</i> | 3.44                         | 2.59         |
| <i>MYCMA_RS22575</i> | Taurine catabolism dioxygenase          |                                                  | <i>MAB_0086</i>  | <i>Rv3406</i>  | -               | 3.41                         | 5.90         |
| <i>MYCMA_RS19295</i> | Membrane protein                        |                                                  | <i>MAB_0766</i>  | -              | -               | 3.36                         | 0.00         |
| <i>MYCMA_RS11690</i> | Transcriptional regulator               |                                                  | <i>MAB_2562c</i> | <i>Rv0081</i>  | <i>MAV_5108</i> | 3.32                         | 0.00         |
| <i>MYCMA_RS21395</i> | Catalase                                |                                                  | <i>MAB_0351</i>  | -              | <i>katA</i>     | 3.27                         | 0.00         |
| <i>MYCMA_RS00530</i> | SAM-dependent methyltransferase         |                                                  | -                | -              | -               | 3.26                         | 0.00         |

|                      |                                     |                                                                                      |                  |                |                 |      |      |
|----------------------|-------------------------------------|--------------------------------------------------------------------------------------|------------------|----------------|-----------------|------|------|
| <i>MYCMA_RS07025</i> | Hypothetical protein                | 2 isopropylmate synthase LeuA, allosteric (dimerization) domain superfamily (036230) | <i>MAB_3424c</i> | -              | <i>MAV_3928</i> | 3.25 | 3.06 |
| <i>MYCMA_RS19455</i> | Hypothetical protein                | No IPR                                                                               | <i>MAB_0733</i>  | -              | -               | 3.22 | 1.62 |
| <i>MYCMA_RS06265</i> | Alkane 1-monooxygenase              |                                                                                      | <i>MAB_3598c</i> | <i>alkB</i>    | <i>MAV_4215</i> | 3.14 | 2.51 |
| <i>MYCMA_RS15610</i> | Guanylate cyclase                   | Papain-like cysteine peptidase superfamily (IPR038765)                               | <i>MAB_1591</i>  | <i>Rv1118c</i> | <i>MAV_1249</i> | 3.14 | 0.00 |
| <i>MYCMA_RS14880</i> | ABC transporter                     |                                                                                      | <i>MAB_1846</i>  | -              | -               | 3.09 | 2.68 |
| <i>MYCMA_RS14875</i> | Peptidase                           |                                                                                      | <i>MAB_1847</i>  | -              | -               | 3.04 | 0.87 |
| <i>MYCMA_RS02705</i> | MULTISPECIES: aminotransferase AlaT |                                                                                      | <i>MAB_4294</i>  | <i>aspC</i>    | <i>MAV_4818</i> | 3.04 | 1.54 |
| <i>MYCMA_RS19450</i> | Hypothetical protein                | Leukocidin/porin MspA superfamily (036435)                                           | <i>MAB_0734</i>  | -              | -               | 3.00 | 3.15 |
